# Supplementary material for: Connective tissue fibroblasts from highly regenerative mammals are refractory to ROS-induced cellular senescence
Source: PubMed Central journal article supplement (PMC6764955; doi:10.1038/s41467-019-12398-w), 2019-09-27
Supplement: 41467_2019_12398_MOESM1_ESM.pdf [file 41467_2019_12398_MOESM1_ESM.pdf]

**Supplementary Information**

**Connective tissue fibroblasts from highly regenerative mammals are refractory to ROS-induced cellular senescence**

Sandeep Saxena<sup>1</sup>, Hemendra Vekaria<sup>2,3</sup>, Patrick G. Sullivan<sup>2,3,4</sup> and Ashley W. Seifert<sup>1,3†</sup>

*<sup>1</sup>Department of Biology, University of Kentucky, Lexington, KY 40506, USA*

*<sup>2</sup>Department of Neuroscience, University of Kentucky, Lexington, KY 40506, USA*

*<sup>3</sup>The Spinal Cord and Brain Injury Research Center (SCoBIRC), University of Kentucky, Lexington, KY 40506, USA*

*<sup>4</sup>Lexington VA Medical Center, Lexington, KY 40506, USA*

## Supplementary Information

### Supplementary Figures

#### Supplementary Figure 1.

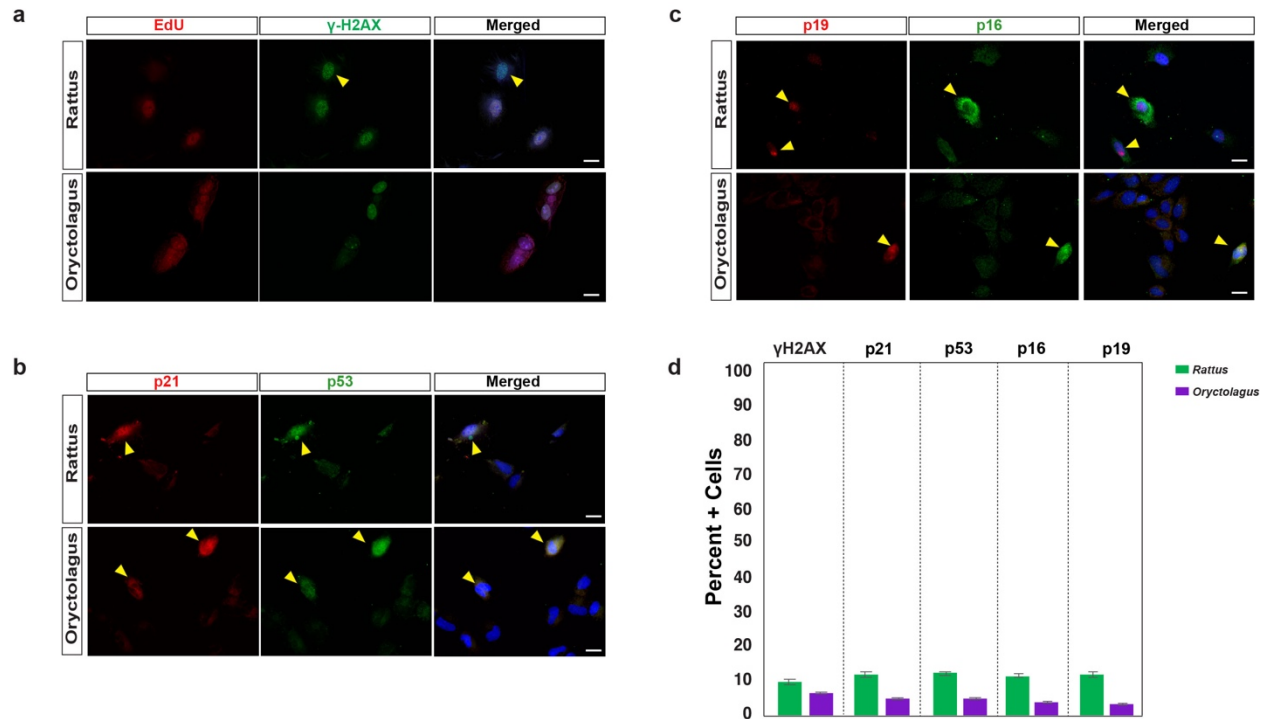

#### ***Rattus* and *Oryctolagus* have few percent+ cells for senescent markers at P2 (a-c)**

Representative images for *Rattus* and *Oryctolagus* fibroblasts at P2 ( $n=4$ /species) double labeled with  $\gamma$ -H2AX and EdU (a), p21 and p53 (b) and p16 and p19 (c). Yellow arrows indicate the positive senescent cells. (d) Percent positive cells were counted for  $\gamma$ -H2AX, p21, p53, p16 and p19. Scale bars in (a-c) = 20  $\mu$ m. Error bars = S.E.M. Source data are provided as a Source Data file.

## Supplementary Information

### Supplementary Figure 2.

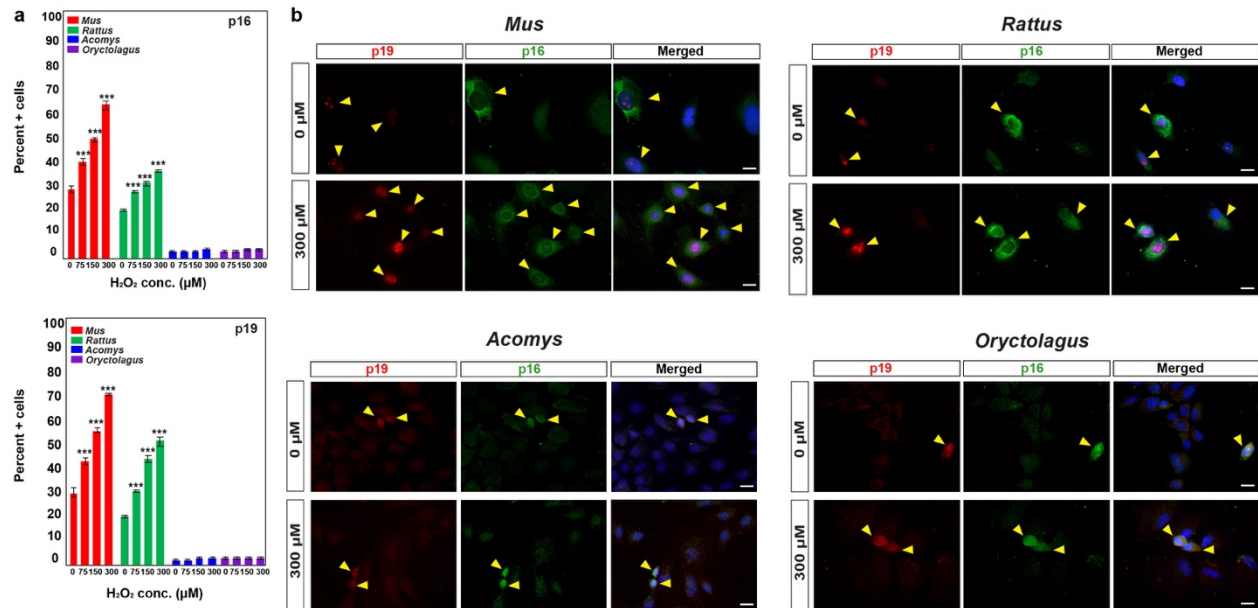

**Fibroblasts from regenerating animals do not significantly increase p16 and p19 upon H<sub>2</sub>O<sub>2</sub> exposure.** (a-b) Fibroblasts ( $n=4$ /species) from all the four species were treated with different sub-lethal dose of H<sub>2</sub>O<sub>2</sub> (0μM-control, 75μM, 150μM and 300μM H<sub>2</sub>O<sub>2</sub>) for 2hrs and cultured for 48hrs. (a) The percentage of p16+ and p19+ cells were significantly increased in *Rattus* and *Mus* while these markers did not significantly change in *Acomys* and *Oryctolagus* (p16+ cells, ANOVA,  $F=757.2077$ ,  $P<.0001$  and p19+ cells, ANOVA,  $F=1064.6167$ ,  $P<.0001$ ). Error bars shows S.E.M. (b) Representative images showing positive staining for p16 and p19 (yellow arrows). DAPI = blue in merged panels. \*\*\* $P<0.0001$ , \*\*  $P<0.001$  and \*  $P<0.05$ . Scale bars = 20μm. Error bars = S.E.M. Source data are provided as a Source Data file.

## Supplementary Information

### Supplementary Figure 3.

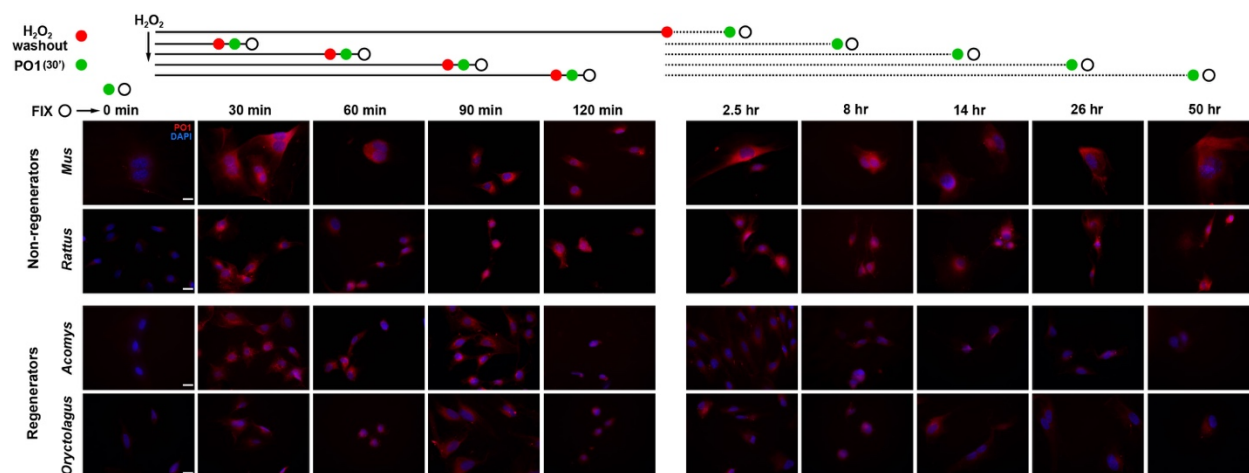

**Rapid detoxification of H<sub>2</sub>O<sub>2</sub> in fibroblasts from regenerators compared to non-regenerators.** PO1 fluorescence indicating intracellular H<sub>2</sub>O<sub>2</sub> level in fibroblasts from regenerating (*Acomys* and *Oryctolagus*) and non-regenerating mammals (*Mus* and *Rattus*) treated with PBS (control) or 300 $\mu$ M H<sub>2</sub>O<sub>2</sub> for different time periods ( $n=4$ /species). Schematic at top indicates time post exposure and H<sub>2</sub>O<sub>2</sub> washout (red circle), followed by 30mins PO1 treatment (green circle) and fixation (open circle). Time points post exposure include time until fixation. PO1 fluorescence in untreated cells indicated physiological levels of H<sub>2</sub>O<sub>2</sub> across all cells which were not significantly different among species. In response to exogenous H<sub>2</sub>O<sub>2</sub> intracellular H<sub>2</sub>O<sub>2</sub> remained high and elevated in fibroblasts from non-regenerating species even at 48hrs post H<sub>2</sub>O<sub>2</sub> washout. Intracellular H<sub>2</sub>O<sub>2</sub> increased in fibroblasts from regenerating species but was reduced near baseline levels after H<sub>2</sub>O<sub>2</sub> washout. Scale bars are representative for all panels and = 20 $\mu$ m.

## Supplementary Information

### Supplementary Figure 4.

#### (a) GPx1

|             |     |                                                                                          |
|-------------|-----|------------------------------------------------------------------------------------------|
| Rattus      | 1   | MSAARLSAVAQSTVYAFSARPLAGGEPVSLGSLRGKVLLIENVASLU <sup>U</sup> GTTTTRDYTEMNDL              |
| Acomys      | 1   | -----MNDL                                                                                |
| Mus         | 1   | MCAARLSAAAQSTVYAFSARPLTGGGEPVSLGSLRGKVLLIENVASLU <sup>U</sup> GTTTTRDYTEMNDL             |
| Oryctolagus | 1   | -MCAARMAAAAQSVYSFSAHPLAGGEPVNLGSLRGKVLLIENVASLU <sup>U</sup> GTTTTRDYTQMNEL              |
| Rattus      | 61  | QKRLGPRGLVVLGFPCNQFGHQENC <sup>K</sup> NEEILNSLKYVRPGGGFEPNFTLFEKCEVNGEKA                |
| Acomys      | 5   | QKRLGPRGLRVLGFPCNQFGHQENAKNEEILNSLKYIRPGGGFEPNFTLFEKCEVNGEKA                             |
| Mus         | 61  | QKRLGPRGLVVLGFPCNQFGHQENC <sup>K</sup> NEEILNSLKYVRPGGGFEPNFTLFEKCEVNGEKA                |
| Oryctolagus | 60  | QERLGPRALVVLGFPCNQFGHQENAKNEEILNSLKYVRPGGGFEPNFMFLQKCEVNGAKA                             |
| Rattus      | 121 | HPLFTFLRNALPAPSDDPTALMTDPKYIIWSPVCRNDIS <sup>W</sup> NFEKFLVGPDPGVPVRRYSRR               |
| Acomys      | 65  | HPLFRFLREALPAPSEPTALMTDPKYIIWSPVCRNDVA <sup>W</sup> NFEKFLVGPDPGVPVRRYSRR                |
| Mus         | 121 | HPLFTFLRNALPTPSDDPTALMTDPKYIIWSPVCRNDIA <sup>W</sup> NFEKFLVGPDPGVPVRRYSRR               |
| Oryctolagus | 120 | SPLFAFLREALPPPSDDPTALMTDPKFIIT <sup>W</sup> CPVCRNDVSW <sup>S</sup> FEKFLVGPDPGVPVRRYSRR |
| Rattus      | 181 | FRTIDIEPDIEALLSK <sup>Q</sup> PSNP                                                       |
| Acomys      | 125 | FRTIDIEPDIEALLSQ <sup>Q</sup> PSSP                                                       |
| Mus         | 181 | FRTIDIEPDIETLLSQ <sup>Q</sup> SGNS                                                       |
| Oryctolagus | 180 | FPTIDIEPDIQ <sup>Q</sup> ALLSKGSGGA                                                      |

#### (b) GPx2

|             |     |                                                                                                     |
|-------------|-----|-----------------------------------------------------------------------------------------------------|
| Rattus      | 1   | MAYIAKSFYDLSAIGLDGEKIDFNTFRGRAVLIENVASLU <sup>U</sup> GTTTTRDYTQLNELQCRFP <sup>R</sup>              |
| Acomys      | 1   | -----MVAAC <sup>P</sup> VR                                                                          |
| Mus         | 1   | MAYIAKSFYDLSAVGLDGEKIDFNTFRGRAVLIENVASLU <sup>U</sup> GTTTTRDYNQLNELQCRFP <sup>R</sup>              |
| Oryctolagus | 1   | MAYIAKSFYDLTAVSLDGEKIDFNTFRGRAVLIENVASLU <sup>U</sup> GTTTTRDFTQLNELQCR <sup>Y</sup> PR             |
| Rattus      | 61  | LVLGFPCNQFGHQENCQNEEILNSLKYVRPGGGFQPTFSL <sup>T</sup> QKCDVNGQNH <sup>Q</sup> HPVFAYLK              |
| Acomys      | 10  | LVILGFPCNQFGHQENCQNEEILNSLKYVRPGR <sup>R</sup> GYQPTFTLTQKCEVNGQNEH <sup>Q</sup> HPVFAYLK           |
| Mus         | 61  | LVLGFPCNQFGHQENCQNEEILNSLKYVRPGGGYQPTFSL <sup>T</sup> QKCDVNGQNEH <sup>Q</sup> HPVFAYLK             |
| Oryctolagus | 61  | LVLGFPCNQFGHQENCQDEEILNSLKYVRPGGGYQPTFTL <sup>V</sup> QKCEVNGQNH <sup>Q</sup> HPVFT <sup>Y</sup> LK |
| Rattus      | 121 | DKLPYPYDDPFSLMTDPKLI <sup>I</sup> WSPVRRSDVSW <sup>N</sup> NFEKFLIGPEGEPFRYSRTFQTINIEP              |
| Acomys      | 70  | DKLPYPYDDPFSLMTDPKLI <sup>M</sup> WSPVRRSDVA <sup>W</sup> NFEKFLIGPEGEPFRYSRTFQTINIEP               |
| Mus         | 121 | DKLPYPYDDPFSLMTDPKLI <sup>I</sup> WSPVRRSDVSW <sup>N</sup> NFEKFLIGPEGEPFRYSRS <sup>F</sup> QTINIEP |
| Oryctolagus | 121 | DKLPYPHDDPFSLMTDPKFI <sup>I</sup> WSPVRRSDVA <sup>W</sup> NFEKFLIGPEGEPFRYSRTF <sup>P</sup> TINIEP  |
| Rattus      | 181 | DIKRLKVAI                                                                                           |
| Acomys      | 130 | DIKRLKVAI                                                                                           |
| Mus         | 181 | DIKRLKVAI                                                                                           |
| Oryctolagus | 181 | DIKRLKVAI                                                                                           |

## Supplementary Information

### (c) GPx3

|             |     |                                                                                                                             |
|-------------|-----|-----------------------------------------------------------------------------------------------------------------------------|
| Rattus      | 1   | MARILRASCLLSLLL <del>LAGFVPPGRGQEKS</del> KTDC <del>HGGMSGTIY</del> EYGAL <del>TIDGEEYI</del> PFKQYA                        |
| Acomys      | 1   | MARILRASCLLSLLL <del>LAGF</del> I <del>PPGRGQEKS</del> KTDC <del>NG</del> -----                                             |
| Mus         | 1   | MARILRASCLLSLLL <del>LAGFVPPGRGQEKS</del> KTDC <del>HGGMSGTIY</del> EYGAL <del>TIDGEEYI</del> PFKQYA                        |
| Oryctolagus | 1   | MARILRASCLLSLLL <del>LAGFVPPGRGQEKS</del> KTDC <del>HGGV</del> SGTIY <del>EYGAL</del> TIDGEEYI <del>PFKQYA</del>            |
|             |     |                                                                                                                             |
| Rattus      | 61  | GKYILFVNVASYU <del>GLTDQY</del> LELNALQEELGPFGLVILGFPCNQFGKQEPGENSEILPSLK                                                   |
| Acomys      | 35  | -----G <del>VSDQY</del> LELNALQEELGPFGLVILGFPCNQFGKQEPGENSEILPSLK                                                           |
| Mus         | 61  | GKYILFVNVASYU <del>GLTDQY</del> LELNALQEELGPFGLVILGFPSNQFGKQEPGENSEILPSLK                                                   |
| Oryctolagus | 61  | GKYVLFVNVATYU <del>GLTGQY</del> VELNALQEELAPFGLVILGFPCNQFGKQEPGENSEILPALK                                                   |
|             |     |                                                                                                                             |
| Rattus      | 121 | YVRPGGGFVPNFQ <del>LF</del> EKGDVNGEKEQKFY <del>TFLKN</del> SCPPTAELLGSPGR <del>LF</del> WEPMKIHDIR                         |
| Acomys      | 82  | YVRPGGGFVPNFQ <del>LF</del> EKGDVNGV <del>KEQ</del> KFY <del>TFLKN</del> SCPPTAELLGSPGR <del>LF</del> WEPMKIHDIR            |
| Mus         | 121 | YVRPGGGFVPNFQ <del>LF</del> EKGDVNGEKEQKFY <del>TFLKN</del> SCPPTAELLGSPGR <del>LF</del> WEPMKIHDIR                         |
| Oryctolagus | 121 | YVRPGGGFVPNFQ <del>LF</del> EKGDVNGD <del>KEQ</del> KVY <del>TFLKN</del> SCPPTSELLGSPN <del>RL</del> WEPMKMH <del>DVR</del> |
|             |     |                                                                                                                             |
| Rattus      | 181 | WNFEKFLVGP <del>DG</del> IPIMRWYHRTTVSNVKMDILSYMRRQAALGARGK                                                                 |
| Acomys      | 142 | WNFEKFLVGP <del>DG</del> IPVMRWYHRTTVSNVKMDILSYMRRQAALGARGK                                                                 |
| Mus         | 181 | WNFEKFLVGP <del>DG</del> IPVMRWYHRTTVSNVKMDILSYMRRQAALSARGK                                                                 |
| Oryctolagus | 181 | WNFEKFLVGP <del>DG</del> VPIMRWYHRATVSNVKMDILAYMRRQAAMGAKGK                                                                 |

## Supplementary Information

### (d) Catalase

|             |     |                                                                 |
|-------------|-----|-----------------------------------------------------------------|
| Rattus      | 1   | MADSRDPASDQMKQWKEQRAPQKPDVLTGGGNPIGDKLNIMTAGPRGPLLVDVVFTE       |
| Acomys      | 1   | MADSRDPASDQMKQWKEQRALQKPDVLTGGGNPIGDKLNIMTAGSRGPLLVDVVFTE       |
| Mus         | 1   | MSDSRDPASDQMKQWKEQRASQRKPDVLTGGGNPIGDKLNIMTAGSRGPLLVDVVFTE      |
| Oryctolagus | 1   | MGDSRDPASDQMKKQWKEQRGAQKPDVLTGGGNPIGDKLNIMTAGPRGPLLVDVVFTE      |
| Rattus      | 61  | MAHFDREIRIPERVVHAKGAGAFGYFEVTHDITRYSKAKVFEHIGKRTPIAVRFSTVAGES   |
| Acomys      | 61  | MAHFDREIRIPERVVHAKGAGAFGYFEVTHDITSYCKAKVFEHIGKRTPIAVRFSTVAGES   |
| Mus         | 61  | MAHFDREIRIPERVVHAKGAGAFGYFEVTHDITRYSKAKVFEHIGKRTPIAVRFSTVAGES   |
| Oryctolagus | 61  | MAHFDREIRIPERVVHAKGTGAFGYFEVTHDITRYSKAKVFEHIGKKTPIAVRFSTVAGES   |
| Rattus      | 121 | GSADTVRDPGRFAVKFYTEDGNWDLVGNNTPIFFIRDAILFPSFIHSQKRNPQTHLKDPD    |
| Acomys      | 121 | GSADTVRDPGRFAVKFYTEDGNWDLVGNNTPIFFIRDAILFPSFIHSQKRNPQTHLKDPD    |
| Mus         | 121 | GSADTVRDPGRFAVKFYTEDGNWDLVGNNTPIFFIRDAILFPSFIHSQKRNPQTHLKDPD    |
| Oryctolagus | 121 | GSADTVRDPGRFAVKFYTEDGNWDLVGNNTPIFFIRDAILFPSFIHSQKRNPQTHLKDPD    |
| Rattus      | 181 | MVWDFWSLCPESLHQVTFLFSDRGI PDGHRHMNGYGSHTFKLVNANGEAVYCKFHYKTDQ   |
| Acomys      | 181 | MVWDFWSLRPELHQVVSFLFSDRGI PDGHRHMNGYGSHTFKLVNANGEAVYCKFHYKTDQ   |
| Mus         | 181 | MVWDFWSLRPELHQVVSFLFSDRGI PDGHRHMNGYGSHTFKLVNADGEAVYCKFHYKTDQ   |
| Oryctolagus | 181 | MVWDFWSLRPELHQVVSFLFSDRGI PDGHRHMNGYGSHTFKLVNASGEAVYCKFHYKTDQ   |
| Rattus      | 241 | GIKNLPVEEAGRLAQEDPDYGLRDLFNAIASGNYPSTWTFYIQVMTFKEAETFPFNPFDLT   |
| Acomys      | 241 | GIKNLPVGEAGRLAQEDPDYGLRDLFNAIANGNYPTWTFYIQVMTFKEAETFPFNPFDLT    |
| Mus         | 241 | GIKNLPVGEAGRLAQEDPDYGLRDLFNAIANGNYPSWTFYIQVMTFKEAETFPFNPFDLT    |
| Oryctolagus | 241 | GIKNLPVADAARISQEDPDYGI RDLFNAIATGNYPSTWTFYIQVMTFDQAETFPFNPFDLT  |
| Rattus      | 301 | KVWPHKDYPLIPVGKLVNLRNPANYFAEVEQMAFDPSNMPPGIEPSPDKMLQGRLFAYPD    |
| Acomys      | 301 | KVWPHKDYPLIPVGKLVNLRNPVNYFAEVEQMAFDPSNMPPGIEPSPDKMLQGRLFAYPD    |
| Mus         | 301 | KVWPHKDYPLIPVGKLVNKNPVNYFAEVEQMAFDPSNMPPGIEPSPDKMLQGRLFAYPD     |
| Oryctolagus | 301 | KI WPHKDYPLIPVGKLVNLRNPVNYFAEIEQLAFDPSNMPPGIEPSPDKMLQGR LFSYPD  |
| Rattus      | 361 | THRHLGPNYLQIPVNCPYRARVANYQRDGP MCMHDNQQGAPNYYPNSFSAPEQQGSALE    |
| Acomys      | 361 | THRHLGPNYLQIPVNCPYRARVANYQRDGP MCMHDNQQGAPNYYPNSFSAPEQQRSALE    |
| Mus         | 361 | THRHLGPNYLQIPVNCPYRARVANYQRDGP MCMHDNQQGAPNYYPNSFSAPEQQRSALE    |
| Oryctolagus | 361 | THRHLGPNYLQIPVNCPYRARVANYQRDGP MCTTDNQQGAPNYYPNSFSAPDQQPSALE    |
| Rattus      | 421 | HHSQCSADV KRFNSANEDNVTQVRTFYTKVLNEEERKRLCENIANHLKDAQLFIQK KAVK  |
| Acomys      | 421 | HGAQCSVDV KRFNSANEDNVTQVRTFYTKVLNEEERKRLCENIAGHLKDAQLFIQK KAVK  |
| Mus         | 421 | HSVQCAVDV KRFNSANEDNVTQVRTFYTKVLNEEERKRLCENIAGHLKDAQLFIQK KAVK  |
| Oryctolagus | 421 | HGTRCSGDVQRFNSTINEDNVSQVRDFYV KVLNEEERKRLCENIAGHLKDAQLFIQK KAVK |
| Rattus      | 481 | NFTDVHPDYGARVQALLDQYNSQKPKNAIHTYVQAGSHIAAKGKANL                 |
| Acomys      | 481 | NFSDVHPDYGARIQALLDKYNAEKPKNAIHTYMQAGSHLAAKEKANL                 |
| Mus         | 481 | NFTDVHPDYGARIQALLDKYNAEKPKNAIHTYMQAGSHMAAKGKANL                 |
| Oryctolagus | 481 | NFSDVHPDYGARIQALLDKYNAEKPKNAIHTFVQSGSHLTAKEKANL                 |

## Supplementary Information

(e)

| Percent identity matrix score to <i>Mus</i> across all species |               |               |                    |
|----------------------------------------------------------------|---------------|---------------|--------------------|
| Protein name                                                   | <i>Acomys</i> | <i>Rattus</i> | <i>Oryctolagus</i> |
| GPx1                                                           | 91.03         | 94.52         | 82.50              |
| GPx2                                                           | 89.92         | 97.36         | 91.05              |
| GPx3                                                           | 94.65         | 98.67         | 90.26              |
| Catalase                                                       | 96.77         | 95.06         | 90.89              |

**High sequence conservation of GPx (1-3) and catalase protein sequences across all four species examined in this study.** The fasta sequences of GPx1 (a), GPx2 (b), GPx3 (c) and catalase (d) were aligned using the multiple sequence alignment tool clustal omega. (a-c) The blue color marked amino acid ‘U’ is important for GPx activity. The 5’ missing sequence for *Acomys* is an assembly artifact. (e) The percent identity matrix score for GPx1 compared to *Mus* was 91.03 for *Acomys*, 94.52 for *Rattus* and 82.50 for *Oryctolagus*, while it was  $\geq 90$  for GPx2, GPx3 and catalase.



## Supplementary Information

### Supplementary Figure 5.

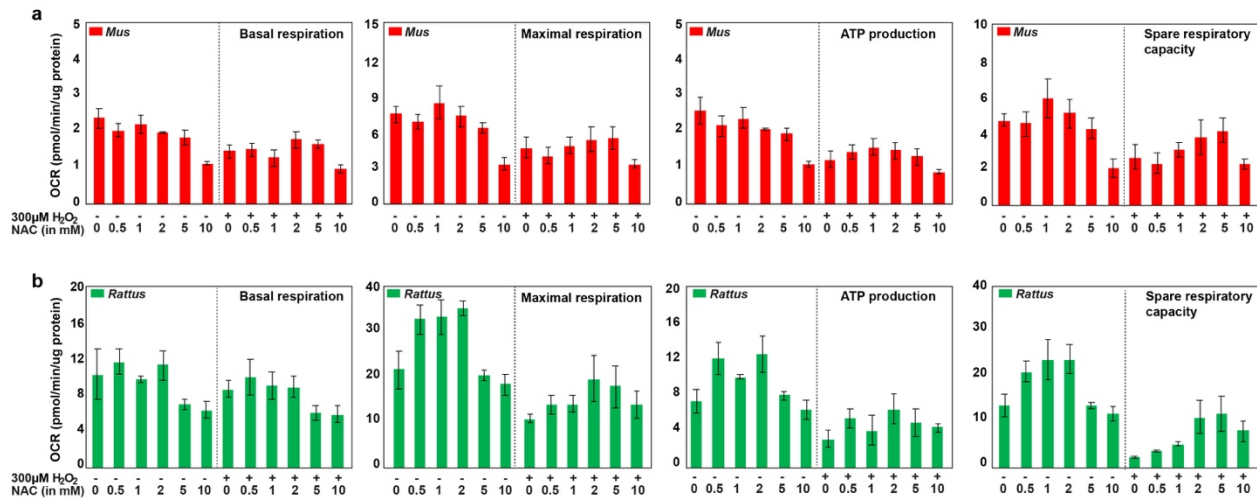

**Optimized NAC pre-treatment protects *Mus* and *Rattus* cells from stress-induced senescence.** (a-b) The 1hr pre-treatment with different concentrations of NAC (0mM-control, 0.5mM, 1mM 2mM, 5mM and 10mM NAC) showed varying levels of protection in *Mus* (a) and *Rattus* (b) cells in response to exogenous H<sub>2</sub>O<sub>2</sub> treatment ( $n=3$ /species). Indicated parameters were measured via mitochondrial stress testing. The normalized OCR were analyzed for non-treated and NAC+ H<sub>2</sub>O<sub>2</sub> (pre-treatment with different concentrations of NAC followed by 2hrs of 300μM H<sub>2</sub>O<sub>2</sub> treatment) treated samples in *Mus* (a) and *Rattus* (b) for all the measured parameters such as basal respiration, maximal respiration, ATP production, and spare respiratory capacity. The data support 2mM NAC as the optimal dose across *Mus* and *Rattus*. Source data are provided as a Source Data file.

## Supplementary Information

### Supplementary Figure 6.

(a) **CDKN2A (p16)**

|             |     |                                                                 |
|-------------|-----|-----------------------------------------------------------------|
| Rattus      | 1   | -----MESSADRLARAAALGREHEVRALLEAGASPNAPNTFGRTPIQVMMMGNVKVA       |
| Acomys      | 1   | MESLKDQQPDSLGDQLSRAAAQGRVHEVRTLLEAGVSPNAPNSFGRTPIQVMMMGNTQITA   |
| Mus         | 1   | -----MESAADRLARAAAQGRVHDVRALLEAGVSPNAPNSFGRTPIQVMMMGNVHVA       |
| Oryctolagus | 1   | -----MEPSADRLATAAARGRVEEVRRALLEAGVPPDAPNRYGRSAIQVMMMG SARVA     |
| Rattus      | 53  | ALLLSYGADSNCEDPTTL SRPVHDAAREGF LDTLVVLHQAGARLDVRDAWGRLPLDLALE  |
| Acomys      | 61  | NLLLFYGADPNCEDPVTL SRPVHDAAREGF LDTLVVALHQAGARLDVRDAFDRLPMDLAQE |
| Mus         | 53  | ALLLNYGADSNCEDPTTF SRPVHDAAREGF LDTLVVLHGS GARLDVRDAWGRLPLDLAQE |
| Oryctolagus | 53  | ELLLLHGAEPNCADPATL SRPVHDAAREGF LDTLVVALHRAGARLDVRDAGGRLPVDLAEE |
| Rattus      | 113 | RGHHDVVRYLRYLLS SAGNVSRVTDRHNFCSS TPRCLGLRGQPPKQR-----          |
| Acomys      | 121 | QGHRDVLVLYLQVAGGATAQASPTTGTASAYPPDPDSDLPDLEKQHIK-----           |
| Mus         | 113 | RGHQDIVRYLRSAGCSLCSAGWSLCTAGNVAQTDGHSFSSSTPRALELRGQSQEQS        |
| Oryctolagus | 113 | RGHRDVARYLRAAEEGGNHARARAVEGTADTPNSNDL-----                      |

(b) **CDKN2D (p19)**

|             |     |                                                                  |
|-------------|-----|------------------------------------------------------------------|
| Rattus      | 1   | MLLEEVSVGDRLSGAAARGDVQEVRRLLHRELVHPDALNRFGKTALQVMMFGSPAVALLEL    |
| Acomys      | 1   | MLLEEVCVGDRLSGAAARGDVQEVRRLLHRELVHPDALNRFGKTALQVMMFGSPAVALLEL    |
| Mus         | 1   | MLLEEVCVGDRLSGAAARGDVQEVRRLLHRELVHPDALNRFGKTALQVMMFGSPAVALLEL    |
| Oryctolagus | 1   | MLLEEV RAGDRLSGAAARGDVQEVRRLLHRELVHPDALNRFGKTALQVMMFGSPSTALEL    |
| Rattus      | 61  | LKQGASPNVQDASGTSPVHDAARTGF LDTLKV LVEHGADVNTLDSTGSLPIHLAIREGHS   |
| Acomys      | 61  | LKQGASPNVQDASGTSPVHDAARTGF LDTLKV LVEHGADV NALDSTGSLPIHLAIREGHS  |
| Mus         | 61  | LKQGASPNVQDASGTSPVHDAARTGF LDTLKV LVEHGADV NALDSTGSLPIHLAIREGHS  |
| Oryctolagus | 61  | LKQGASPNVQDASGTAPAHDAARTGF LDTLKV LVDHGADV NVDPDGAGALPIHLAVREGHA |
| Rattus      | 121 | SVVSFLAPESDLHKKDASGLTPELARQ RGAQNLM DILQSHMMI PM                 |
| Acomys      | 121 | SVVSFLAPESDLYHRDAAGL TPELARQ RGAHHLADILQRHMVIPV                  |
| Mus         | 121 | SVVSFLAPESDLHHRDASGLTPELARQ RGAQNLM DILQGHMMI PM                 |
| Oryctolagus | 121 | AVVSFLAAESDLQHRDARGL TPELARQ R GARDLIDILQRHAGAPL                 |

## Supplementary Information

### (c) CDKN1A (p21)

|             |   |                                                              |
|-------------|---|--------------------------------------------------------------|
| Rattus      | 1 | MSDPGDVRLPVPHRSKVCRRLFGPVDSEQLSRDCDALMASCLQEARERWNFDFATETPLE |
| Acomys      | 1 | MSDHRDVRPPPPHRSKVCRRLFGPVDSEQLRRDGDALMASCLQEARERWNFDFVTETPLE |
| Mus         | 1 | MSNLGDVRLPVPHRSKVCRCLFGPVDSEQLRRDCDALMAGCLQEARERWNFDFVTETPLE |
| Oryctolagus | 1 | MSQPSDEAPQPPHRSKACRRLFGPVDSEQLRRDCDALMADCLQEARERWNFDFVTETPLE |

|             |    |                                                              |
|-------------|----|--------------------------------------------------------------|
| Rattus      | 60 | GNVWVERVRSPLPKIYLSPGSRRRDDLGGDKRPSTSSALLQGPAPEDHVALSLSCTL    |
| Acomys      | 61 | GNVWVERVGGLGLPKLYLSPGSRGRDDLGGDKRPGTSSALLQGPAPEDHVALSLSCTLVS |
| Mus         | 60 | GNFVWVERVRSGLPKVYLSPGSRSRDDLGGDKRPSTSSALLQGPAPEDHVALSLSCTLVS |
| Oryctolagus | 61 | GNFAWERVRGLGLPKLYLAPGPRGGREDPAGCKRPSTSATLLPAAQEDHVDLSLCTLVP  |

|             |     |                                                |
|-------------|-----|------------------------------------------------|
| Rattus      | 120 | VSHAPERPEDSPGGTGTSQGRKRRQTSLTDFYHSKRRLVFCKRKP  |
| Acomys      | 121 | HAPERPEDSPGGLGTSQGRKRRQTSLTDFYHSKRRLVFCKRKP--  |
| Mus         | 120 | ERPEDSPGGPGTSGRKRKRRQTSLTDFYHSKRRLVFCKRKP----- |
| Oryctolagus | 121 | RSPERPEESPGGPGTSGRKRKRRRQTSLTDFYHSKRRLVFSKRKP- |



## Supplementary Information

(e)

| Percent identity matrix score to <i>Mus</i> across all species |               |               |                    |
|----------------------------------------------------------------|---------------|---------------|--------------------|
| Protein name                                                   | <i>Acomys</i> | <i>Rattus</i> | <i>Oryctolagus</i> |
| p16                                                            | 60.47         | 77.35         | 63.51              |
| p19                                                            | 95.18         | 97.59         | 84.33              |
| p21                                                            | 87.42         | 89.30         | 71.69              |
| p53                                                            | 72.05         | 86.66         | 77.43              |

(f)

| Percent identity matrix score to <i>Mus</i> across all species in target region |               |               |                    |
|---------------------------------------------------------------------------------|---------------|---------------|--------------------|
| Target protein                                                                  | <i>Acomys</i> | <i>Rattus</i> | <i>Oryctolagus</i> |
| p16                                                                             | 66.67         | 79.79         | 66.30              |
| p19                                                                             | 90.32         | 96.77         | 77.42              |

**Protein alignments across all species for panel of senescent markers. (a-d)** The fasta sequences of p16, p19, p21 and p53 were aligned through the multiple sequence alignment tool-clustal omega. **(e-f)** The percent identity matrix score was calculated to show the sequence similarities across all species. Amino acid target sequences for p16 and p19 are indicated in red.

## Supplementary Information

### Supplementary Tables

(SE = Standard Error, DF = Degree of Freedom, SS=Sum of Squares, MS= Mean Square)

**Supplementary Table 1.** ANOVA table and Tukey-HSD post-hoc comparisons to test for differences in percent EdU+ cells at 20% O<sub>2</sub> at passage 2 (P2) for *Acomys*, *Mus*, *Rattus* and *Oryctolagus* fibroblasts.  $n = 4/\text{species}$ .

| Source   | DF | SS        | MS       | F Ratio  | P-value |
|----------|----|-----------|----------|----------|---------|
| Model    | 3  | 1.8136401 | 0.604547 | 143.3982 | <.0001* |
| Error    | 12 | 0.0505903 | 0.004216 |          |         |
| C. Total | 15 | 1.8642304 |          |          |         |

| Species            | -Species           | SE        | t-ratio | P-value       |
|--------------------|--------------------|-----------|---------|---------------|
| <i>Acomys</i>      | <i>Mus</i>         | 0.0459122 | 13.28   | <.0001*       |
| <i>Acomys</i>      | <i>Oryctolagus</i> | 0.0459122 | -4.87   | 0.0019*       |
| <i>Acomys</i>      | <i>Rattus</i>      | 0.0459122 | -4.38   | 0.0043*       |
| <i>Mus</i>         | <i>Oryctolagus</i> | 0.0459122 | -18.15  | <.0001*       |
| <i>Mus</i>         | <i>Rattus</i>      | 0.0459122 | -17.66  | <.0001*       |
| <i>Oryctolagus</i> | <i>Rattus</i>      | 0.0459122 | 0.49    | <b>0.9598</b> |

## Supplementary Information

**Supplementary Table 2.** One-way ANOVA table and Tukey-HSD post-hoc comparisons to test for differences in percent EdU+ cells at 3% O<sub>2</sub> at passage 2 (P2) for *Acomys*, *Mus*, *Rattus* and *Oryctolagus* fibroblasts. *n* = 4/species

| Source   | DF | SS         | MS       | F Ratio | P-value |
|----------|----|------------|----------|---------|---------|
| Model    | 3  | 0.13588278 | 0.045294 | 17.3085 | 0.0001* |
| Error    | 12 | 0.03140255 | 0.002617 |         |         |
| C. Total | 15 | 0.16728532 |          |         |         |

| Species            | -Species           | SE        | t-ratio | P-value       |
|--------------------|--------------------|-----------|---------|---------------|
| <i>Acomys</i>      | <i>Mus</i>         | 0.0361724 | 6.12    | 0.0003*       |
| <i>Acomys</i>      | <i>Oryctolagus</i> | 0.0361724 | -0.17   | <b>0.9983</b> |
| <i>Acomys</i>      | <i>Rattus</i>      | 0.0361724 | 1.37    | <b>0.5382</b> |
| <i>Mus</i>         | <i>Oryctolagus</i> | 0.0361724 | -6.29   | 0.0002*       |
| <i>Mus</i>         | <i>Rattus</i>      | 0.0361724 | -4.75   | 0.0023*       |
| <i>Oryctolagus</i> | <i>Rattus</i>      | 0.0361724 | 1.54    | <b>0.4469</b> |

## Supplementary Information

**Supplementary Table 3.** Two-way repeated measures ANOVA table and effect test followed by Tukey-HSD post-hoc comparisons of different passages of *Acomys*, *Mus*, *Rattus* and *Oryctolagus* fibroblasts to test for differences in percent SA- $\beta$ gal<sup>+</sup> cells at 3% O<sub>2</sub> across passage.  $n = 5$  (*Acomys*, *Mus*) and  $n=4$  (*Rattus*, *Oryctolagus*).

| Source   | DF  | SS        | MS       | F Ratio  | P-value |
|----------|-----|-----------|----------|----------|---------|
| Model    | 35  | 11.676187 | 0.333605 | 240.5825 | <.0001* |
| Error    | 118 | 0.163625  | 0.001387 |          |         |
| C. Total | 153 | 11.839812 |          |          |         |

| Source           | DF | SS        | MS       | F Ratio  | P-value | Notes    |
|------------------|----|-----------|----------|----------|---------|----------|
| Species          | 2  | 4.2081889 | 2.104094 | 1517.387 | <.0001* | Lost DFs |
| Passages         | 5  | 1.2188249 | 0.243765 | 175.7934 | <.0001* | Lost DFs |
| Species*Passages | 23 | 0.9566262 | 0.041592 | 29.9948  | <.0001* | Lost DFs |

| Species       | Passages | Species            | Passages | SE        | t-ratio | P-value       |
|---------------|----------|--------------------|----------|-----------|---------|---------------|
| <i>Acomys</i> | P1       | <i>Mus</i>         | P1       | 0.0235513 | -5.26   | 0.0004*       |
| <i>Acomys</i> | P1       | <i>Rattus</i>      | P1       | 0.0249799 | 7.27    | <.0001*       |
| <i>Acomys</i> | P1       | <i>Oryctolagus</i> | P1       | 0.0249799 | 10.43   | <.0001*       |
| <i>Mus</i>    | P1       | <i>Rattus</i>      | P1       | 0.0249799 | 12.23   | <.0001*       |
| <i>Mus</i>    | P1       | <i>Oryctolagus</i> | P1       | 0.0249799 | 15.39   | <.0001*       |
| <i>Rattus</i> | P1       | <i>Oryctolagus</i> | P1       | 0.0263311 | -2.99   | <b>0.5322</b> |
| <i>Acomys</i> | P13      | <i>Mus</i>         | P13      | 0.0271947 | -23.81  | <.0001*       |
| <i>Acomys</i> | P13      | <i>Rattus</i>      | P13      | 0.0249799 | 7.43    | <.0001*       |
| <i>Acomys</i> | P13      | <i>Oryctolagus</i> | P13      | 0.0249799 | 19.60   | <.0001*       |
| <i>Mus</i>    | P13      | <i>Rattus</i>      | P13      | 0.0284409 | 29.29   | <.0001*       |
| <i>Mus</i>    | P13      | <i>Oryctolagus</i> | P13      | 0.0284409 | 39.98   | <.0001*       |
| <i>Rattus</i> | P13      | <i>Oryctolagus</i> | P13      | 0.0263311 | -11.54  | <.0001*       |
| <i>Acomys</i> | P25      | <i>Rattus</i>      | P25      | 0.0284409 | 7.44    | <.0001*       |
| <i>Acomys</i> | P25      | <i>Oryctolagus</i> | P25      | 0.0284409 | 22.51   | <.0001*       |
| <i>Rattus</i> | P25      | <i>Oryctolagus</i> | P25      | 0.0263311 | -16.28  | <.0001*       |



## Supplementary Information

**Supplementary Table 4.** One-way ANOVA tables to test for differences in percent  $\gamma$ -H2AX+, p16+, p19+, p21+ and p53+ cells at 20% O<sub>2</sub> at passage 2 (P2) for *Acomys* and *Mus* fibroblasts.  $n = 3/\text{species}$ .

### $\gamma$ -H2AX+ cells:

| Source   | DF | SS         | MS       | F Ratio | P-value |
|----------|----|------------|----------|---------|---------|
| Species  | 1  | 0.39334422 | 0.393344 | 122.89  | 0.0004* |
| Error    | 4  | 0.01280314 | 0.003201 |         |         |
| C. Total | 5  | 0.40614736 |          |         |         |

### p16+ cells:

| Source   | DF | SS         | MS       | F Ratio  | P-value |
|----------|----|------------|----------|----------|---------|
| Species  | 1  | 0.59012946 | 0.590129 | 1344.405 | <.0001* |
| Error    | 4  | 0.00175581 | 0.000439 |          |         |
| C. Total | 5  | 0.59188527 |          |          |         |

### p19+ cells:

| Source   | DF | SS         | MS       | F Ratio  | P-value |
|----------|----|------------|----------|----------|---------|
| Species  | 1  | 0.59915874 | 0.599159 | 531.8164 | <.0001* |
| Error    | 4  | 0.00450651 | 0.001127 |          |         |
| C. Total | 5  | 0.60366525 |          |          |         |

### p21+ cells:

| Source   | DF | SS         | MS       | F Ratio  | P-value |
|----------|----|------------|----------|----------|---------|
| Species  | 1  | 0.87138249 | 0.871382 | 483.2017 | <.0001* |
| Error    | 4  | 0.00721341 | 0.001803 |          |         |
| C. Total | 5  | 0.8785959  |          |          |         |

### p53+ cells:

| Source   | DF | SS         | MS       | F Ratio  | P-value |
|----------|----|------------|----------|----------|---------|
| Species  | 1  | 0.91160233 | 0.911602 | 676.4388 | <.0001* |
| Error    | 4  | 0.0053906  | 0.001348 |          |         |
| C. Total | 5  | 0.91699293 |          |          |         |

## Supplementary Information

**Supplementary Table 5.** Two-way ANOVA table and effect test followed by Tukey-HSD post-hoc comparisons of passage 2 (P2) *Acomys* and *Mus* H<sub>2</sub>O<sub>2</sub> treated fibroblasts cultured for 24hrs to test for differences in percent EdU+ cells at 3% O<sub>2</sub>. *n* = 4/species

| Source   | DF | SS         | MS       | F Ratio | P-value |
|----------|----|------------|----------|---------|---------|
| Model    | 7  | 0.50795239 | 0.072565 | 76.9827 | <.0001* |
| Error    | 24 | 0.02262264 | 0.000943 |         |         |
| C. Total | 31 | 0.53057503 |          |         |         |

| Source                | DF | SS         | MS        | F Ratio | P-value       |
|-----------------------|----|------------|-----------|---------|---------------|
| Species               | 1  | 0.49929011 | 0.4992901 | 529.689 | <.0001*       |
| Concentration         | 3  | 0.00846757 | 0.0028225 | 2.9944  | <b>0.0507</b> |
| Species*Concentration | 3  | 0.00019471 | 0.0000649 | 0.0689  | <b>0.976</b>  |

| Species       | Concentration                     | Species       | Concentration                       | DF | SE        | t-ratio | P-value       |
|---------------|-----------------------------------|---------------|-------------------------------------|----|-----------|---------|---------------|
| <i>Acomys</i> | 0μM H <sub>2</sub> O <sub>2</sub> | <i>Acomys</i> | 75μM H <sub>2</sub> O <sub>2</sub>  | 24 | 0.0217096 | 0.73    | <b>0.9952</b> |
| <i>Acomys</i> | 0μM H <sub>2</sub> O <sub>2</sub> | <i>Acomys</i> | 150μM H <sub>2</sub> O <sub>2</sub> | 24 | 0.0217096 | 0.90    | <b>0.9837</b> |
| <i>Acomys</i> | 0μM H <sub>2</sub> O <sub>2</sub> | <i>Acomys</i> | 300μM H <sub>2</sub> O <sub>2</sub> | 24 | 0.0217096 | 1.79    | <b>0.6323</b> |
| <i>Mus</i>    | 0μM H <sub>2</sub> O <sub>2</sub> | <i>Mus</i>    | 75μM H <sub>2</sub> O <sub>2</sub>  | 24 | 0.0217096 | 1.08    | <b>0.9558</b> |
| <i>Mus</i>    | 0μM H <sub>2</sub> O <sub>2</sub> | <i>Mus</i>    | 150μM H <sub>2</sub> O <sub>2</sub> | 24 | 0.0217096 | 1.26    | <b>0.9039</b> |
| <i>Mus</i>    | 0μM H <sub>2</sub> O <sub>2</sub> | <i>Mus</i>    | 300μM H <sub>2</sub> O <sub>2</sub> | 24 | 0.0217096 | 2.43    | <b>0.2721</b> |

## Supplementary Information

**Supplementary Table 6.** Two-way ANOVA table and effect test followed by Tukey-HSD post-hoc comparisons of passage 2 (P2) *Acomys* and *Mus* H<sub>2</sub>O<sub>2</sub> treated fibroblasts cultured for 48hrs to test for differences in percent EdU+ cells at 3% O<sub>2</sub>. n = 4/species

| Source   | DF | SS         | MS       | F Ratio | P-value |
|----------|----|------------|----------|---------|---------|
| Model    | 7  | 0.63440329 | 0.090629 | 63.3481 | <.0001* |
| Error    | 24 | 0.03433563 | 0.001431 |         |         |
| C. Total | 31 | 0.66873892 |          |         |         |

| Source                | DF | SS         | MS        | F Ratio  | P-value |
|-----------------------|----|------------|-----------|----------|---------|
| Species               | 1  | 0.51365713 | 0.5136571 | 359.0373 | <.0001* |
| Concentration         | 3  | 0.1010219  | 0.033674  | 23.5375  | <.0001* |
| Species*Concentration | 3  | 0.01972426 | 0.0065748 | 4.5956   | 0.0112* |

| Species       | Concentration                     | Species       | Concentration                       | DF | SE        | t-ratio | P-value       |
|---------------|-----------------------------------|---------------|-------------------------------------|----|-----------|---------|---------------|
| <i>Acomys</i> | 0μM H <sub>2</sub> O <sub>2</sub> | <i>Acomys</i> | 75μM H <sub>2</sub> O <sub>2</sub>  | 24 | 0.0267456 | 0.82    | <b>0.9899</b> |
| <i>Acomys</i> | 0μM H <sub>2</sub> O <sub>2</sub> | <i>Acomys</i> | 150μM H <sub>2</sub> O <sub>2</sub> | 24 | 0.0267456 | 1.23    | <b>0.9160</b> |
| <i>Acomys</i> | 0μM H <sub>2</sub> O <sub>2</sub> | <i>Acomys</i> | 300μM H <sub>2</sub> O <sub>2</sub> | 24 | 0.0267456 | 3.32    | 0.0493*       |
| <i>Mus</i>    | 0μM H <sub>2</sub> O <sub>2</sub> | <i>Mus</i>    | 75μM H <sub>2</sub> O <sub>2</sub>  | 24 | 0.0267456 | 1.83    | <b>0.6103</b> |
| <i>Mus</i>    | 0μM H <sub>2</sub> O <sub>2</sub> | <i>Mus</i>    | 150μM H <sub>2</sub> O <sub>2</sub> | 24 | 0.0267456 | 7.94    | 0.0019*       |
| <i>Mus</i>    | 0μM H <sub>2</sub> O <sub>2</sub> | <i>Mus</i>    | 300μM H <sub>2</sub> O <sub>2</sub> | 24 | 0.0267456 | 2.43    | <.0001*       |

## Supplementary Information

**Supplementary Table 7.** Two-way ANOVA table and effect test followed by Tukey-HSD post-hoc comparisons of passage 2 (P2) *Acomys* and *Mus* H<sub>2</sub>O<sub>2</sub> treated fibroblasts cultured for 24hrs to test for differences in percent SA $\beta$ -gal+ cells at 3% O<sub>2</sub>. *n* = 4/species.

| Source   | DF | SS         | MS       | F Ratio | P-value       |
|----------|----|------------|----------|---------|---------------|
| Model    | 7  | 0.00157176 | 0.000225 | 1.1424  | <b>0.3708</b> |
| Error    | 24 | 0.00471734 | 0.000197 |         |               |
| C. Total | 31 | 0.00628911 |          |         |               |

| Source                | DF | SS         | MS        | F Ratio | P-value       |
|-----------------------|----|------------|-----------|---------|---------------|
| Species               | 1  | 0.00000419 | 0.0000042 | 0.0213  | <b>0.8851</b> |
| Concentration         | 3  | 0.00108725 | 0.0003624 | 1.8438  | <b>0.1662</b> |
| Species*Concentration | 3  | 0.00048032 | 0.0001601 | 0.8146  | <b>0.4984</b> |

| Species       | Concentration                           | Species       | Concentration                             | DF | SE        | t-ratio | P-value       |
|---------------|-----------------------------------------|---------------|-------------------------------------------|----|-----------|---------|---------------|
| <i>Acomys</i> | 0 $\mu$ M H <sub>2</sub> O <sub>2</sub> | <i>Acomys</i> | 75 $\mu$ M H <sub>2</sub> O <sub>2</sub>  | 24 | 0.0099135 | -0.36   | <b>1.0000</b> |
| <i>Acomys</i> | 0 $\mu$ M H <sub>2</sub> O <sub>2</sub> | <i>Acomys</i> | 150 $\mu$ M H <sub>2</sub> O <sub>2</sub> | 24 | 0.0099135 | -1.22   | <b>0.9174</b> |
| <i>Acomys</i> | 0 $\mu$ M H <sub>2</sub> O <sub>2</sub> | <i>Acomys</i> | 300 $\mu$ M H <sub>2</sub> O <sub>2</sub> | 24 | 0.0099135 | -0.09   | <b>1.0000</b> |
| <i>Mus</i>    | 0 $\mu$ M H <sub>2</sub> O <sub>2</sub> | <i>Mus</i>    | 75 $\mu$ M H <sub>2</sub> O <sub>2</sub>  | 24 | 0.0099135 | -2.41   | <b>0.2817</b> |
| <i>Mus</i>    | 0 $\mu$ M H <sub>2</sub> O <sub>2</sub> | <i>Mus</i>    | 150 $\mu$ M H <sub>2</sub> O <sub>2</sub> | 24 | 0.0099135 | -1.54   | <b>0.7789</b> |
| <i>Mus</i>    | 0 $\mu$ M H <sub>2</sub> O <sub>2</sub> | <i>Mus</i>    | 300 $\mu$ M H <sub>2</sub> O <sub>2</sub> | 24 | 0.0099135 | -0.98   | <b>0.9725</b> |

## Supplementary Information

**Supplementary Table 8.** Two-way ANOVA table and effect test followed by Tukey-HSD post-hoc comparisons of passage 2 (P2) *Acomys* and *Mus* H<sub>2</sub>O<sub>2</sub> treated fibroblasts cultured for 48hrs to test for differences in percent SA $\beta$ -gal+ cells at 3% O<sub>2</sub>. *n* = 4/species

| Source   | DF | SS         | MS       | F Ratio  | P-value |
|----------|----|------------|----------|----------|---------|
| Model    | 7  | 0.12711831 | 0.01816  | 223.0515 | <.0001* |
| Error    | 24 | 0.00195396 | 0.000081 |          |         |
| C. Total | 31 | 0.12907227 |          |          |         |

| Source                | DF | SS         | MS        | F Ratio  | P-value |
|-----------------------|----|------------|-----------|----------|---------|
| Species               | 1  | 0.08094173 | 0.0809417 | 994.1859 | <.0001* |
| Concentration         | 3  | 0.03001148 | 0.0100038 | 122.8743 | <.0001* |
| Species*Concentration | 3  | 0.0161651  | 0.0053884 | 66.1839  | <.0001* |

| Species       | Concentration                           | Species       | Concentration                             | DF | SE        | t-ratio | P-value       |
|---------------|-----------------------------------------|---------------|-------------------------------------------|----|-----------|---------|---------------|
| <i>Acomys</i> | 0 $\mu$ M H <sub>2</sub> O <sub>2</sub> | <i>Acomys</i> | 75 $\mu$ M H <sub>2</sub> O <sub>2</sub>  | 24 | 0.0063802 | -0.85   | <b>0.9875</b> |
| <i>Acomys</i> | 0 $\mu$ M H <sub>2</sub> O <sub>2</sub> | <i>Acomys</i> | 150 $\mu$ M H <sub>2</sub> O <sub>2</sub> | 24 | 0.0063802 | -1.33   | <b>0.8790</b> |
| <i>Acomys</i> | 0 $\mu$ M H <sub>2</sub> O <sub>2</sub> | <i>Acomys</i> | 300 $\mu$ M H <sub>2</sub> O <sub>2</sub> | 24 | 0.0063802 | -3.75   | 0.0189*       |
| <i>Mus</i>    | 0 $\mu$ M H <sub>2</sub> O <sub>2</sub> | <i>Mus</i>    | 75 $\mu$ M H <sub>2</sub> O <sub>2</sub>  | 24 | 0.0063802 | -7.42   | <.0001*       |
| <i>Mus</i>    | 0 $\mu$ M H <sub>2</sub> O <sub>2</sub> | <i>Mus</i>    | 150 $\mu$ M H <sub>2</sub> O <sub>2</sub> | 24 | 0.0063802 | -15.83  | <.0001*       |
| <i>Mus</i>    | 0 $\mu$ M H <sub>2</sub> O <sub>2</sub> | <i>Mus</i>    | 300 $\mu$ M H <sub>2</sub> O <sub>2</sub> | 24 | 0.0063802 | -21.91  | <.0001*       |

## Supplementary Information

**Supplementary Table 9.** Two-way ANOVA table and effect test followed by Tukey-HSD post-hoc comparisons of passage 2 (P2) *Acomys* and *Mus* H<sub>2</sub>O<sub>2</sub> treated fibroblasts cultured for 24hrs to test for differences in percent  $\gamma$ H2AX + at 3% O<sub>2</sub>. *n* = 4/species

| Source   | DF | SS         | MS       | F Ratio  | P-value |
|----------|----|------------|----------|----------|---------|
| Model    | 7  | 0.93711498 | 0.133874 | 168.5012 | <.0001* |
| Error    | 24 | 0.01906791 | 0.000794 |          |         |
| C. Total | 31 | 0.95618289 |          |          |         |

| Source                | DF | SS         | MS        | F Ratio  | P-value |
|-----------------------|----|------------|-----------|----------|---------|
| Species               | 1  | 0.75181847 | 0.7518185 | 946.2832 | <.0001* |
| Concentration         | 3  | 0.09080154 | 0.0302672 | 38.0961  | <.0001* |
| Species*Concentration | 3  | 0.09449497 | 0.0314983 | 39.6457  | <.0001* |

| Species       | Concentration                           | Species       | Concentration                             | DF | SE        | t-ratio | P-value       |
|---------------|-----------------------------------------|---------------|-------------------------------------------|----|-----------|---------|---------------|
| <i>Acomys</i> | 0 $\mu$ M H <sub>2</sub> O <sub>2</sub> | <i>Acomys</i> | 75 $\mu$ M H <sub>2</sub> O <sub>2</sub>  | 24 | 0.0199311 | -0.31   | <b>1.0000</b> |
| <i>Acomys</i> | 0 $\mu$ M H <sub>2</sub> O <sub>2</sub> | <i>Acomys</i> | 150 $\mu$ M H <sub>2</sub> O <sub>2</sub> | 24 | 0.0199311 | 0.19    | <b>1.0000</b> |
| <i>Acomys</i> | 0 $\mu$ M H <sub>2</sub> O <sub>2</sub> | <i>Acomys</i> | 300 $\mu$ M H <sub>2</sub> O <sub>2</sub> | 24 | 0.0199311 | 0.08    | <b>1.0000</b> |
| <i>Mus</i>    | 0 $\mu$ M H <sub>2</sub> O <sub>2</sub> | <i>Mus</i>    | 75 $\mu$ M H <sub>2</sub> O <sub>2</sub>  | 24 | 0.0199311 | -3.05   | <b>0.0870</b> |
| <i>Mus</i>    | 0 $\mu$ M H <sub>2</sub> O <sub>2</sub> | <i>Mus</i>    | 150 $\mu$ M H <sub>2</sub> O <sub>2</sub> | 24 | 0.0199311 | -3.83   | 0.0155*       |
| <i>Mus</i>    | 0 $\mu$ M H <sub>2</sub> O <sub>2</sub> | <i>Mus</i>    | 300 $\mu$ M H <sub>2</sub> O <sub>2</sub> | 24 | 0.0199311 | -14.31  | <.0001*       |

## Supplementary Information

**Supplementary Table 10.** Two-way ANOVA table and effect test followed by Tukey-HSD post-hoc comparisons of passage 2 (P2) *Acomys* and *Mus* H<sub>2</sub>O<sub>2</sub> treated fibroblasts cultured for 48hrs to test for differences in percent  $\gamma$ H2AX+ cells at 3% O<sub>2</sub>. *n* = 4/species

| Source   | DF | SS         | MS       | F Ratio | P-value |
|----------|----|------------|----------|---------|---------|
| Model    | 7  | 0.01040014 | 0.001486 | 377.375 | <.0001* |
| Error    | 24 | 0.00009449 | 3.94E-06 |         |         |
| C. Total | 31 | 0.01049462 |          |         |         |

| Source                | DF | SS         | MS        | F Ratio  | P-value |
|-----------------------|----|------------|-----------|----------|---------|
| Species               | 1  | 0.00901419 | 0.0090142 | 2289.596 | <.0001* |
| Concentration         | 3  | 0.00095015 | 0.0003167 | 80.4456  | <.0001* |
| Species*Concentration | 3  | 0.0004358  | 0.0001453 | 36.8974  | <.0001* |

| Species       | Concentration                           | Species       | Concentration                             | DF | SE        | t-ratio | P-value       |
|---------------|-----------------------------------------|---------------|-------------------------------------------|----|-----------|---------|---------------|
| <i>Acomys</i> | 0 $\mu$ M H <sub>2</sub> O <sub>2</sub> | <i>Acomys</i> | 75 $\mu$ M H <sub>2</sub> O <sub>2</sub>  | 24 | 0.0014030 | -0.56   | <b>0.9990</b> |
| <i>Acomys</i> | 0 $\mu$ M H <sub>2</sub> O <sub>2</sub> | <i>Acomys</i> | 150 $\mu$ M H <sub>2</sub> O <sub>2</sub> | 24 | 0.0014030 | -0.98   | <b>0.9734</b> |
| <i>Acomys</i> | 0 $\mu$ M H <sub>2</sub> O <sub>2</sub> | <i>Acomys</i> | 300 $\mu$ M H <sub>2</sub> O <sub>2</sub> | 24 | 0.0014030 | -3.55   | 0.0296*       |
| <i>Mus</i>    | 0 $\mu$ M H <sub>2</sub> O <sub>2</sub> | <i>Mus</i>    | 75 $\mu$ M H <sub>2</sub> O <sub>2</sub>  | 24 | 0.0014030 | -4.96   | 0.0010*       |
| <i>Mus</i>    | 0 $\mu$ M H <sub>2</sub> O <sub>2</sub> | <i>Mus</i>    | 150 $\mu$ M H <sub>2</sub> O <sub>2</sub> | 24 | 0.0014030 | -11.01  | <.0001*       |
| <i>Mus</i>    | 0 $\mu$ M H <sub>2</sub> O <sub>2</sub> | <i>Mus</i>    | 300 $\mu$ M H <sub>2</sub> O <sub>2</sub> | 24 | 0.0014030 | -17.31  | <.0001*       |

## Supplementary Information

**Supplementary Table 11.** Two-way ANOVA table and effect test followed by Tukey-HSD post-hoc comparisons of passage 2 (P2) *Acomys* and *Mus* H<sub>2</sub>O<sub>2</sub> treated fibroblasts cultured for 48hrs to test for differences in percent p16+ cells at 3% O<sub>2</sub>. *n* = 4/species

| Source   | DF | SS        | MS       | F Ratio  | P-value |
|----------|----|-----------|----------|----------|---------|
| Model    | 7  | 3.0718042 | 0.438829 | 783.3681 | <.0001* |
| Error    | 24 | 0.0134444 | 0.00056  |          |         |
| C. Total | 31 | 3.0852486 |          |          |         |

| Source                | DF | SS        | MS       | F Ratio  | P-value |
|-----------------------|----|-----------|----------|----------|---------|
| Species               | 1  | 2.7740331 | 2.774033 | 4952.016 | <.0001* |
| Concentration         | 3  | 0.1560128 | 0.052004 | 92.8345  | <.0001* |
| Species*Concentration | 3  | 0.1417583 | 0.047253 | 84.3524  | <.0001* |

| Species       | Concentration                     | Species       | Concentration                       | DF | SE        | t-ratio | P-value       |
|---------------|-----------------------------------|---------------|-------------------------------------|----|-----------|---------|---------------|
| <i>Acomys</i> | 0μM H <sub>2</sub> O <sub>2</sub> | <i>Acomys</i> | 75μM H <sub>2</sub> O <sub>2</sub>  | 24 | 0.0167359 | -0.10   | <b>1.0000</b> |
| <i>Acomys</i> | 0μM H <sub>2</sub> O <sub>2</sub> | <i>Acomys</i> | 150μM H <sub>2</sub> O <sub>2</sub> | 24 | 0.0167359 | -0.42   | <b>0.9999</b> |
| <i>Acomys</i> | 0μM H <sub>2</sub> O <sub>2</sub> | <i>Acomys</i> | 300μM H <sub>2</sub> O <sub>2</sub> | 24 | 0.0167359 | -0.49   | <b>0.9996</b> |
| <i>Mus</i>    | 0μM H <sub>2</sub> O <sub>2</sub> | <i>Mus</i>    | 75μM H <sub>2</sub> O <sub>2</sub>  | 24 | 0.0167359 | -7.29   | <.0001*       |
| <i>Mus</i>    | 0μM H <sub>2</sub> O <sub>2</sub> | <i>Mus</i>    | 150μM H <sub>2</sub> O <sub>2</sub> | 24 | 0.0167359 | -13.24  | <.0001*       |
| <i>Mus</i>    | 0μM H <sub>2</sub> O <sub>2</sub> | <i>Mus</i>    | 300μM H <sub>2</sub> O <sub>2</sub> | 24 | 0.0167359 | -22.24  | <.0001*       |



## Supplementary Information

**Supplementary Table 12.** Two-way ANOVA table and effect test followed by Tukey-HSD post-hoc comparisons of passage 2 (P2) *Acomys* and *Mus* H<sub>2</sub>O<sub>2</sub> treated fibroblasts which were fixed after 48 hrs to test for differences in percent p19+ cells at 3% O<sub>2</sub>. *n* = 4/species.

| Source   | DF | SS        | MS       | F Ratio  | P-value |
|----------|----|-----------|----------|----------|---------|
| Model    | 7  | 3.6133041 | 0.516186 | 1094.501 | <.0001* |
| Error    | 24 | 0.0113188 | 0.000472 |          |         |
| C. Total | 31 | 3.6246229 |          |          |         |

| Source                | DF | SS        | MS       | F Ratio  | P-value |
|-----------------------|----|-----------|----------|----------|---------|
| Species               | 1  | 3.1955264 | 3.195526 | 6775.668 | <.0001* |
| Concentration         | 3  | 0.231747  | 0.077249 | 163.7958 | <.0001* |
| Species*Concentration | 3  | 0.1860307 | 0.06201  | 131.484  | <.0001* |

| Species       | Concentration                     | Species       | Concentration                       | DF | SE        | t-ratio | P-value       |
|---------------|-----------------------------------|---------------|-------------------------------------|----|-----------|---------|---------------|
| <i>Acomys</i> | 0μM H <sub>2</sub> O <sub>2</sub> | <i>Acomys</i> | 75μM H <sub>2</sub> O <sub>2</sub>  | 24 | 0.0153561 | -0.38   | <b>0.9999</b> |
| <i>Acomys</i> | 0μM H <sub>2</sub> O <sub>2</sub> | <i>Acomys</i> | 150μM H <sub>2</sub> O <sub>2</sub> | 24 | 0.0153561 | -1.20   | <b>0.9248</b> |
| <i>Acomys</i> | 0μM H <sub>2</sub> O <sub>2</sub> | <i>Acomys</i> | 300μM H <sub>2</sub> O <sub>2</sub> | 24 | 0.0153561 | -1.46   | <b>0.8184</b> |
| <i>Mus</i>    | 0μM H <sub>2</sub> O <sub>2</sub> | <i>Mus</i>    | 75μM H <sub>2</sub> O <sub>2</sub>  | 24 | 0.0153561 | -9.14   | <.0001*       |
| <i>Mus</i>    | 0μM H <sub>2</sub> O <sub>2</sub> | <i>Mus</i>    | 150μM H <sub>2</sub> O <sub>2</sub> | 24 | 0.0153561 | -17.64  | <.0001*       |
| <i>Mus</i>    | 0μM H <sub>2</sub> O <sub>2</sub> | <i>Mus</i>    | 300μM H <sub>2</sub> O <sub>2</sub> | 24 | 0.0153561 | -28.45  | <.0001*       |

## Supplementary Information

**Supplementary Table 13.** Two-way ANOVA table and effect test followed by Tukey-HSD post-hoc comparisons of passage 2 (P2) *Acomys* and *Mus* H<sub>2</sub>O<sub>2</sub> treated fibroblasts cultured for 48hrs to test for differences in percent p21+ cells at 3% O<sub>2</sub>. *n* = 4/species.

| Source   | DF | SS        | MS       | F Ratio  | P-value |
|----------|----|-----------|----------|----------|---------|
| Model    | 7  | 2.8679554 | 0.409708 | 526.5525 | <.0001* |
| Error    | 24 | 0.0186743 | 0.000778 |          |         |
| C. Total | 31 | 2.8866297 |          |          |         |

| Source                | DF | SS        | MS       | F Ratio  | P-value |
|-----------------------|----|-----------|----------|----------|---------|
| Species               | 1  | 2.5203031 | 2.520303 | 3239.068 | <.0001* |
| Concentration         | 3  | 0.1804059 | 0.060135 | 77.2853  | <.0001* |
| Species*Concentration | 3  | 0.1672464 | 0.055749 | 71.6478  | <.0001* |

| Species       | Concentration                     | Species       | Concentration                       | DF | SE        | t-ratio | P-value       |
|---------------|-----------------------------------|---------------|-------------------------------------|----|-----------|---------|---------------|
| <i>Acomys</i> | 0μM H <sub>2</sub> O <sub>2</sub> | <i>Acomys</i> | 75μM H <sub>2</sub> O <sub>2</sub>  | 24 | 0.0197243 | 0.05    | <b>1.0000</b> |
| <i>Acomys</i> | 0μM H <sub>2</sub> O <sub>2</sub> | <i>Acomys</i> | 150μM H <sub>2</sub> O <sub>2</sub> | 24 | 0.0197243 | -0.29   | <b>1.0000</b> |
| <i>Acomys</i> | 0μM H <sub>2</sub> O <sub>2</sub> | <i>Acomys</i> | 300μM H <sub>2</sub> O <sub>2</sub> | 24 | 0.0197243 | -0.43   | <b>0.9998</b> |
| <i>Mus</i>    | 0μM H <sub>2</sub> O <sub>2</sub> | <i>Mus</i>    | 75μM H <sub>2</sub> O <sub>2</sub>  | 24 | 0.0197243 | -13.35  | <.0001*       |
| <i>Mus</i>    | 0μM H <sub>2</sub> O <sub>2</sub> | <i>Mus</i>    | 150μM H <sub>2</sub> O <sub>2</sub> | 24 | 0.0197243 | -15.93  | <.0001*       |
| <i>Mus</i>    | 0μM H <sub>2</sub> O <sub>2</sub> | <i>Mus</i>    | 300μM H <sub>2</sub> O <sub>2</sub> | 24 | 0.0197243 | -19.89  | <.0001*       |

## Supplementary Information

**Supplementary Table 14.** Two-way ANOVA table and effect test followed by Tukey-HSD post-hoc comparisons of passage 2 (P2) *Acomys* and *Mus* H<sub>2</sub>O<sub>2</sub> treated fibroblasts cultured for 48hrs to test for differences in percent p53+ cells at 3% O<sub>2</sub>. *n* = 4/species

| Source   | DF | SS        | MS       | F Ratio  | P-value |
|----------|----|-----------|----------|----------|---------|
| Model    | 7  | 2.6094404 | 0.372777 | 399.1625 | <.0001* |
| Error    | 24 | 0.0224136 | 0.000934 |          |         |
| C. Total | 31 | 2.631854  |          |          |         |

| Source                | DF | SS        | MS       | F Ratio  | P-value |
|-----------------------|----|-----------|----------|----------|---------|
| Species               | 1  | 2.3598669 | 2.359867 | 2526.899 | <.0001* |
| Concentration         | 3  | 0.1296007 | 0.0432   | 46.2579  | <.0001* |
| Species*Concentration | 3  | 0.1199728 | 0.039991 | 42.8215  | <.0001* |

| Species       | Concentration                     | Species       | Concentration                       | DF | SE        | t-ratio | P-value       |
|---------------|-----------------------------------|---------------|-------------------------------------|----|-----------|---------|---------------|
| <i>Acomys</i> | 0μM H <sub>2</sub> O <sub>2</sub> | <i>Acomys</i> | 75μM H <sub>2</sub> O <sub>2</sub>  | 24 | 0.0216090 | -0.06   | <b>1.0000</b> |
| <i>Acomys</i> | 0μM H <sub>2</sub> O <sub>2</sub> | <i>Acomys</i> | 150μM H <sub>2</sub> O <sub>2</sub> | 24 | 0.0216090 | -0.31   | <b>1.0000</b> |
| <i>Acomys</i> | 0μM H <sub>2</sub> O <sub>2</sub> | <i>Acomys</i> | 300μM H <sub>2</sub> O <sub>2</sub> | 24 | 0.0216090 | -0.30   | <b>1.0000</b> |
| <i>Mus</i>    | 0μM H <sub>2</sub> O <sub>2</sub> | <i>Mus</i>    | 75μM H <sub>2</sub> O <sub>2</sub>  | 24 | 0.0216090 | -10.60  | <.0001*       |
| <i>Mus</i>    | 0μM H <sub>2</sub> O <sub>2</sub> | <i>Mus</i>    | 150μM H <sub>2</sub> O <sub>2</sub> | 24 | 0.0216090 | -11.74  | <.0001*       |
| <i>Mus</i>    | 0μM H <sub>2</sub> O <sub>2</sub> | <i>Mus</i>    | 300μM H <sub>2</sub> O <sub>2</sub> | 24 | 0.0216090 | -15.59  | <.0001*       |

## Supplementary Information

**Supplementary Table 15.** Two-way ANOVA table and effect test followed by Tukey-HSD post-hoc comparisons of passage 2 (P2) *Acomys*, *Mus*, *Rattus* and *Oryctolagus* H<sub>2</sub>O<sub>2</sub> treated fibroblasts cultured for 48hrs to test for differences in percent EdU+ cells at 3% O<sub>2</sub>. *n* = 4/species

| Source   | DF | SS        | MS       | F Ratio | P-value |
|----------|----|-----------|----------|---------|---------|
| Model    | 15 | 1.3015089 | 0.086767 | 96.8033 | <.0001* |
| Error    | 48 | 0.0430236 | 0.000896 |         |         |
| C. Total | 63 | 1.3445325 |          |         |         |

| Source                | DF | SS        | MS        | F Ratio  | P-value |
|-----------------------|----|-----------|-----------|----------|---------|
| Species               | 3  | 1.0071227 | 0.3357076 | 374.5375 | <.0001* |
| Concentration         | 3  | 0.2010950 | 0.0670317 | 74.7849  | <.0001* |
| Species*Concentration | 9  | 0.0932912 | 0.0103657 | 11.5646  | <.0001* |

| Species            | Concentration                     | Species            | Concentration                       | DF | SE        | t-ratio | P-value       |
|--------------------|-----------------------------------|--------------------|-------------------------------------|----|-----------|---------|---------------|
| <i>Acomys</i>      | 0μM H <sub>2</sub> O <sub>2</sub> | <i>Acomys</i>      | 75μM H <sub>2</sub> O <sub>2</sub>  | 48 | 0.0211699 | 1.04    | <b>0.9995</b> |
| <i>Acomys</i>      | 0μM H <sub>2</sub> O <sub>2</sub> | <i>Acomys</i>      | 150μM H <sub>2</sub> O <sub>2</sub> | 48 | 0.0211699 | 1.55    | <b>0.9699</b> |
| <i>Acomys</i>      | 0μM H <sub>2</sub> O <sub>2</sub> | <i>Acomys</i>      | 300μM H <sub>2</sub> O <sub>2</sub> | 48 | 0.0211699 | 4.19    | 0.0099*       |
| <i>Mus</i>         | 0μM H <sub>2</sub> O <sub>2</sub> | <i>Mus</i>         | 75μM H <sub>2</sub> O <sub>2</sub>  | 48 | 0.0211699 | 2.31    | <b>0.6214</b> |
| <i>Mus</i>         | 0μM H <sub>2</sub> O <sub>2</sub> | <i>Mus</i>         | 150μM H <sub>2</sub> O <sub>2</sub> | 48 | 0.0211699 | 5.95    | <.0001*       |
| <i>Mus</i>         | 0μM H <sub>2</sub> O <sub>2</sub> | <i>Mus</i>         | 300μM H <sub>2</sub> O <sub>2</sub> | 48 | 0.0211699 | 10.04   | <.0001*       |
| <i>Rattus</i>      | 0μM H <sub>2</sub> O <sub>2</sub> | <i>Rattus</i>      | 75μM H <sub>2</sub> O <sub>2</sub>  | 48 | 0.0211699 | 3.20    | <b>0.1364</b> |
| <i>Rattus</i>      | 0μM H <sub>2</sub> O <sub>2</sub> | <i>Rattus</i>      | 150μM H <sub>2</sub> O <sub>2</sub> | 48 | 0.0211699 | 8.25    | <.0001*       |
| <i>Rattus</i>      | 0μM H <sub>2</sub> O <sub>2</sub> | <i>Rattus</i>      | 300μM H <sub>2</sub> O <sub>2</sub> | 48 | 0.0211699 | 12.88   | <.0001*       |
| <i>Oryctolagus</i> | 0μM H <sub>2</sub> O <sub>2</sub> | <i>Oryctolagus</i> | 75μM H <sub>2</sub> O <sub>2</sub>  | 48 | 0.0211699 | 0.46    | <b>1.0000</b> |
| <i>Oryctolagus</i> | 0μM H <sub>2</sub> O <sub>2</sub> | <i>Oryctolagus</i> | 150μM H <sub>2</sub> O <sub>2</sub> | 48 | 0.0211699 | 0.86    | <b>0.9999</b> |
| <i>Oryctolagus</i> | 0μM H <sub>2</sub> O <sub>2</sub> | <i>Oryctolagus</i> | 300μM H <sub>2</sub> O <sub>2</sub> | 48 | 0.0211699 | 1.09    | <b>0.9991</b> |

## Supplementary Information

**Supplementary Table 16.** Two-way ANOVA table and effect test followed by Tukey-HSD post-hoc comparisons of passage 2 (P2) *Acomys*, *Mus*, *Rattus* and *Oryctolagus* H<sub>2</sub>O<sub>2</sub> treated fibroblasts cultured for 48hrs to test for differences in percent  $\gamma$ -H2AX+ cells at 3% O<sub>2</sub>. *n* = 4/species

| Source   | DF | SS        | MS       | F Ratio  | P-value |
|----------|----|-----------|----------|----------|---------|
| Model    | 15 | 2.9637590 | 0.197584 | 458.4376 | <.0001* |
| Error    | 48 | 0.0206877 | 0.000431 |          |         |
| C. Total | 63 | 2.9844467 |          |          |         |

| Source                | DF | SS        | MS        | F Ratio   | P-value |
|-----------------------|----|-----------|-----------|-----------|---------|
| Species               | 3  | 2.5654649 | 0.8551550 | 1984.1450 | <.0001* |
| Concentration         | 3  | 0.2291150 | 0.0763717 | 177.1989  | <.0001* |
| Species*Concentration | 9  | 0.1691791 | 0.0187977 | 43.6147   | <.0001* |

| Species            | Concentration                           | Species            | Concentration                             | DF | SE        | t-ratio | P-value       |
|--------------------|-----------------------------------------|--------------------|-------------------------------------------|----|-----------|---------|---------------|
| <i>Acomys</i>      | 0 $\mu$ M H <sub>2</sub> O <sub>2</sub> | <i>Acomys</i>      | 75 $\mu$ M H <sub>2</sub> O <sub>2</sub>  | 48 | 0.0146798 | -0.56   | <b>1.0000</b> |
| <i>Acomys</i>      | 0 $\mu$ M H <sub>2</sub> O <sub>2</sub> | <i>Acomys</i>      | 150 $\mu$ M H <sub>2</sub> O <sub>2</sub> | 48 | 0.0146798 | -0.98   | <b>0.9997</b> |
| <i>Acomys</i>      | 0 $\mu$ M H <sub>2</sub> O <sub>2</sub> | <i>Acomys</i>      | 300 $\mu$ M H <sub>2</sub> O <sub>2</sub> | 48 | 0.0146798 | -2.26   | <b>0.6524</b> |
| <i>Mus</i>         | 0 $\mu$ M H <sub>2</sub> O <sub>2</sub> | <i>Mus</i>         | 75 $\mu$ M H <sub>2</sub> O <sub>2</sub>  | 48 | 0.0146798 | -5.71   | <.0001*       |
| <i>Mus</i>         | 0 $\mu$ M H <sub>2</sub> O <sub>2</sub> | <i>Mus</i>         | 150 $\mu$ M H <sub>2</sub> O <sub>2</sub> | 48 | 0.0146798 | -13.16  | <.0001*       |
| <i>Mus</i>         | 0 $\mu$ M H <sub>2</sub> O <sub>2</sub> | <i>Mus</i>         | 300 $\mu$ M H <sub>2</sub> O <sub>2</sub> | 48 | 0.0146798 | -21.79  | <.0001*       |
| <i>Rattus</i>      | 0 $\mu$ M H <sub>2</sub> O <sub>2</sub> | <i>Rattus</i>      | 75 $\mu$ M H <sub>2</sub> O <sub>2</sub>  | 48 | 0.0146798 | -7.23   | <.0001*       |
| <i>Rattus</i>      | 0 $\mu$ M H <sub>2</sub> O <sub>2</sub> | <i>Rattus</i>      | 150 $\mu$ M H <sub>2</sub> O <sub>2</sub> | 48 | 0.0146798 | -13.71  | <.0001*       |
| <i>Rattus</i>      | 0 $\mu$ M H <sub>2</sub> O <sub>2</sub> | <i>Rattus</i>      | 300 $\mu$ M H <sub>2</sub> O <sub>2</sub> | 48 | 0.0146798 | -18.33  | <.0001*       |
| <i>Oryctolagus</i> | 0 $\mu$ M H <sub>2</sub> O <sub>2</sub> | <i>Oryctolagus</i> | 75 $\mu$ M H <sub>2</sub> O <sub>2</sub>  | 48 | 0.0146798 | -0.14   | <b>1.0000</b> |
| <i>Oryctolagus</i> | 0 $\mu$ M H <sub>2</sub> O <sub>2</sub> | <i>Oryctolagus</i> | 150 $\mu$ M H <sub>2</sub> O <sub>2</sub> | 48 | 0.0146798 | -0.15   | <b>1.0000</b> |
| <i>Oryctolagus</i> | 0 $\mu$ M H <sub>2</sub> O <sub>2</sub> | <i>Oryctolagus</i> | 300 $\mu$ M H <sub>2</sub> O <sub>2</sub> | 48 | 0.0146798 | -1.42   | <b>0.9862</b> |

## Supplementary Information

**Supplementary Table 17.** Two-way ANOVA table and effect test followed by Tukey-HSD post-hoc comparisons of passage 2 (P2) *Acomys*, *Mus*, *Rattus* and *Oryctolagus* H<sub>2</sub>O<sub>2</sub> treated fibroblasts cultured for 48hrs to test for differences in percent SA $\beta$ -gal+ cells at 3% O<sub>2</sub>. *n* = 4/species

| Source   | DF | SS        | MS      | F Ratio  | P-value |
|----------|----|-----------|---------|----------|---------|
| Model    | 15 | 11673.223 | 778.215 | 400.8695 | <.0001* |
| Error    | 48 | 93.183    | 1.941   |          |         |
| C. Total | 63 | 11766.406 |         |          |         |

| Source                | DF | SS        | MS       | F Ratio   | P-value |
|-----------------------|----|-----------|----------|-----------|---------|
| Species               | 3  | 10007.054 | 3335.685 | 1718.2584 | <.0001* |
| Concentration         | 3  | 931.108   | 310.369  | 159.8756  | <.0001* |
| Species*Concentration | 9  | 735.061   | 81.673   | 42.0712   | <.0001* |

| Species            | Concentration                           | Species            | Concentration                             | DF | SE        | t-ratio | P-value       |
|--------------------|-----------------------------------------|--------------------|-------------------------------------------|----|-----------|---------|---------------|
| <i>Acomys</i>      | 0 $\mu$ M H <sub>2</sub> O <sub>2</sub> | <i>Acomys</i>      | 75 $\mu$ M H <sub>2</sub> O <sub>2</sub>  | 48 | 0.9852201 | -1.47   | <b>0.9813</b> |
| <i>Acomys</i>      | 0 $\mu$ M H <sub>2</sub> O <sub>2</sub> | <i>Acomys</i>      | 150 $\mu$ M H <sub>2</sub> O <sub>2</sub> | 48 | 0.9852201 | -2.38   | <b>0.5703</b> |
| <i>Acomys</i>      | 0 $\mu$ M H <sub>2</sub> O <sub>2</sub> | <i>Acomys</i>      | 300 $\mu$ M H <sub>2</sub> O <sub>2</sub> | 48 | 0.9852201 | -3.45   | <b>0.0757</b> |
| <i>Mus</i>         | 0 $\mu$ M H <sub>2</sub> O <sub>2</sub> | <i>Mus</i>         | 75 $\mu$ M H <sub>2</sub> O <sub>2</sub>  | 48 | 0.9852201 | -4.49   | 0.0040*       |
| <i>Mus</i>         | 0 $\mu$ M H <sub>2</sub> O <sub>2</sub> | <i>Mus</i>         | 150 $\mu$ M H <sub>2</sub> O <sub>2</sub> | 48 | 0.9852201 | -9.75   | <.0001*       |
| <i>Mus</i>         | 0 $\mu$ M H <sub>2</sub> O <sub>2</sub> | <i>Mus</i>         | 300 $\mu$ M H <sub>2</sub> O <sub>2</sub> | 48 | 0.9852201 | -13.63  | <.0001*       |
| <i>Rattus</i>      | 0 $\mu$ M H <sub>2</sub> O <sub>2</sub> | <i>Rattus</i>      | 75 $\mu$ M H <sub>2</sub> O <sub>2</sub>  | 48 | 0.9852201 | -7.05   | <.0001*       |
| <i>Rattus</i>      | 0 $\mu$ M H <sub>2</sub> O <sub>2</sub> | <i>Rattus</i>      | 150 $\mu$ M H <sub>2</sub> O <sub>2</sub> | 48 | 0.9852201 | -14.10  | <.0001*       |
| <i>Rattus</i>      | 0 $\mu$ M H <sub>2</sub> O <sub>2</sub> | <i>Rattus</i>      | 300 $\mu$ M H <sub>2</sub> O <sub>2</sub> | 48 | 0.9852201 | -24.03  | <.0001*       |
| <i>Oryctolagus</i> | 0 $\mu$ M H <sub>2</sub> O <sub>2</sub> | <i>Oryctolagus</i> | 75 $\mu$ M H <sub>2</sub> O <sub>2</sub>  | 48 | 0.9852201 | -0.43   | <b>1.0000</b> |
| <i>Oryctolagus</i> | 0 $\mu$ M H <sub>2</sub> O <sub>2</sub> | <i>Oryctolagus</i> | 150 $\mu$ M H <sub>2</sub> O <sub>2</sub> | 48 | 0.9852201 | -0.49   | <b>1.0000</b> |
| <i>Oryctolagus</i> | 0 $\mu$ M H <sub>2</sub> O <sub>2</sub> | <i>Oryctolagus</i> | 300 $\mu$ M H <sub>2</sub> O <sub>2</sub> | 48 | 0.9852201 | -0.61   | <b>1.0000</b> |

## Supplementary Information

**Supplementary Table 18.** Two-way ANOVA table and effect test followed by Tukey-HSD post-hoc comparisons of passage 2 (P2) *Acomys*, *Mus*, *Rattus* and *Oryctolagus* H<sub>2</sub>O<sub>2</sub> treated fibroblasts cultured for 48hrs to test for differences in percent p21+ cells at 3% O<sub>2</sub>. *n* = 4/species

| Source   | DF | SS        | MS       | F Ratio  | P-value |
|----------|----|-----------|----------|----------|---------|
| Model    | 15 | 5.5800294 | 0.372002 | 501.4221 | <.0001* |
| Error    | 48 | 0.0356109 | 0.000742 |          |         |
| C. Total | 63 | 5.6156403 |          |          |         |

| Source                | DF | SS        | MS       | F Ratio   | P-value |
|-----------------------|----|-----------|----------|-----------|---------|
| Species               | 3  | 4.8859517 | 1.628651 | 2195.2609 | <.0001* |
| Concentration         | 3  | 0.3824328 | 0.127478 | 171.8273  | <.0001* |
| Species*Concentration | 9  | 0.3116449 | 0.034627 | 46.6741   | <.0001* |

| Species            | Concentration                     | Species            | Concentration                       | DF | SE        | t-ratio | P-value       |
|--------------------|-----------------------------------|--------------------|-------------------------------------|----|-----------|---------|---------------|
| <i>Acomys</i>      | 0μM H <sub>2</sub> O <sub>2</sub> | <i>Acomys</i>      | 75μM H <sub>2</sub> O <sub>2</sub>  | 48 | 0.0192600 | 0.05    | <b>1.0000</b> |
| <i>Acomys</i>      | 0μM H <sub>2</sub> O <sub>2</sub> | <i>Acomys</i>      | 150μM H <sub>2</sub> O <sub>2</sub> | 48 | 0.0192600 | -0.29   | <b>1.0000</b> |
| <i>Acomys</i>      | 0μM H <sub>2</sub> O <sub>2</sub> | <i>Acomys</i>      | 300μM H <sub>2</sub> O <sub>2</sub> | 48 | 0.0192600 | -0.44   | <b>1.0000</b> |
| <i>Mus</i>         | 0μM H <sub>2</sub> O <sub>2</sub> | <i>Mus</i>         | 75μM H <sub>2</sub> O <sub>2</sub>  | 48 | 0.0192600 | -13.67  | <.0001*       |
| <i>Mus</i>         | 0μM H <sub>2</sub> O <sub>2</sub> | <i>Mus</i>         | 150μM H <sub>2</sub> O <sub>2</sub> | 48 | 0.0192600 | -16.32  | <.0001*       |
| <i>Mus</i>         | 0μM H <sub>2</sub> O <sub>2</sub> | <i>Mus</i>         | 300μM H <sub>2</sub> O <sub>2</sub> | 48 | 0.0192600 | -20.37  | <.0001*       |
| <i>Rattus</i>      | 0μM H <sub>2</sub> O <sub>2</sub> | <i>Rattus</i>      | 75μM H <sub>2</sub> O <sub>2</sub>  | 48 | 0.0192600 | -11.83  | <.0001*       |
| <i>Rattus</i>      | 0μM H <sub>2</sub> O <sub>2</sub> | <i>Rattus</i>      | 150μM H <sub>2</sub> O <sub>2</sub> | 48 | 0.0192600 | -16.24  | <.0001*       |
| <i>Rattus</i>      | 0μM H <sub>2</sub> O <sub>2</sub> | <i>Rattus</i>      | 300μM H <sub>2</sub> O <sub>2</sub> | 48 | 0.0192600 | -20.30  | <.0001*       |
| <i>Oryctolagus</i> | 0μM H <sub>2</sub> O <sub>2</sub> | <i>Oryctolagus</i> | 75μM H <sub>2</sub> O <sub>2</sub>  | 48 | 0.0192600 | -0.09   | <b>1.0000</b> |
| <i>Oryctolagus</i> | 0μM H <sub>2</sub> O <sub>2</sub> | <i>Oryctolagus</i> | 150μM H <sub>2</sub> O <sub>2</sub> | 48 | 0.0192600 | -1.61   | <b>0.9593</b> |
| <i>Oryctolagus</i> | 0μM H <sub>2</sub> O <sub>2</sub> | <i>Oryctolagus</i> | 300μM H <sub>2</sub> O <sub>2</sub> | 48 | 0.0192600 | -1.73   | <b>0.9272</b> |

## Supplementary Information

**Supplementary Table 19.** Two-way ANOVA table and effect test followed by Tukey-HSD post-hoc comparisons of passage 2 (P2) *Acomys*, *Mus*, *Rattus* and *Oryctolagus* H<sub>2</sub>O<sub>2</sub> treated fibroblasts cultured for 48hrs to test for differences in percent p53+ cells at 3% O<sub>2</sub>. *n* = 4/species

| Source   | DF | SS        | MS       | F Ratio  | P-value |
|----------|----|-----------|----------|----------|---------|
| Model    | 15 | 5.2533102 | 0.350221 | 564.1753 | <.0001* |
| Error    | 48 | 0.0297968 | 0.000621 |          |         |
| C. Total | 63 | 5.2831069 |          |          |         |

| Source                | DF | SS        | MS       | F Ratio   | P-value |
|-----------------------|----|-----------|----------|-----------|---------|
| Species               | 3  | 4.6881052 | 1.562702 | 2517.3778 | <.0001* |
| Concentration         | 3  | 0.3022541 | 0.100751 | 162.3018  | <.0001* |
| Species*Concentration | 9  | 0.2629508 | 0.029217 | 47.0657   | <.0001* |

| Species            | Concentration                     | Species            | Concentration                       | DF | SE        | t-ratio | P-value       |
|--------------------|-----------------------------------|--------------------|-------------------------------------|----|-----------|---------|---------------|
| <i>Acomys</i>      | 0μM H <sub>2</sub> O <sub>2</sub> | <i>Acomys</i>      | 75μM H <sub>2</sub> O <sub>2</sub>  | 48 | 0.0176177 | -0.08   | <b>1.0000</b> |
| <i>Acomys</i>      | 0μM H <sub>2</sub> O <sub>2</sub> | <i>Acomys</i>      | 150μM H <sub>2</sub> O <sub>2</sub> | 48 | 0.0176177 | -0.38   | <b>1.0000</b> |
| <i>Acomys</i>      | 0μM H <sub>2</sub> O <sub>2</sub> | <i>Acomys</i>      | 300μM H <sub>2</sub> O <sub>2</sub> | 48 | 0.0176177 | -0.36   | <b>1.0000</b> |
| <i>Mus</i>         | 0μM H <sub>2</sub> O <sub>2</sub> | <i>Mus</i>         | 75μM H <sub>2</sub> O <sub>2</sub>  | 48 | 0.0176177 | -13.00  | <.0001*       |
| <i>Mus</i>         | 0μM H <sub>2</sub> O <sub>2</sub> | <i>Mus</i>         | 150μM H <sub>2</sub> O <sub>2</sub> | 48 | 0.0176177 | -14.40  | <.0001*       |
| <i>Mus</i>         | 0μM H <sub>2</sub> O <sub>2</sub> | <i>Mus</i>         | 300μM H <sub>2</sub> O <sub>2</sub> | 48 | 0.0176177 | -19.12  | <.0001*       |
| <i>Rattus</i>      | 0μM H <sub>2</sub> O <sub>2</sub> | <i>Rattus</i>      | 75μM H <sub>2</sub> O <sub>2</sub>  | 48 | 0.0176177 | -14.16  | <.0001*       |
| <i>Rattus</i>      | 0μM H <sub>2</sub> O <sub>2</sub> | <i>Rattus</i>      | 150μM H <sub>2</sub> O <sub>2</sub> | 48 | 0.0176177 | -17.35  | <.0001*       |
| <i>Rattus</i>      | 0μM H <sub>2</sub> O <sub>2</sub> | <i>Rattus</i>      | 300μM H <sub>2</sub> O <sub>2</sub> | 48 | 0.0176177 | -20.99  | <.0001*       |
| <i>Oryctolagus</i> | 0μM H <sub>2</sub> O <sub>2</sub> | <i>Oryctolagus</i> | 75μM H <sub>2</sub> O <sub>2</sub>  | 48 | 0.0176177 | -0.27   | <b>1.0000</b> |
| <i>Oryctolagus</i> | 0μM H <sub>2</sub> O <sub>2</sub> | <i>Oryctolagus</i> | 150μM H <sub>2</sub> O <sub>2</sub> | 48 | 0.0176177 | -0.40   | <b>1.0000</b> |
| <i>Oryctolagus</i> | 0μM H <sub>2</sub> O <sub>2</sub> | <i>Oryctolagus</i> | 300μM H <sub>2</sub> O <sub>2</sub> | 48 | 0.0176177 | -1.47   | <b>0.9814</b> |



## Supplementary Information

**Supplementary Table 20.** Two-way ANOVA table and effect test followed by Tukey-HSD post-hoc comparisons of passage 2 (P2) *Acomys*, *Mus*, *Rattus* and *Oryctolagus* H<sub>2</sub>O<sub>2</sub> treated fibroblasts cultured for 48hrs to test for differences in percent p16+ cells at 3% O<sub>2</sub>. *n* = 4/species

| Source   | DF | SS        | MS       | F Ratio  | P-value |
|----------|----|-----------|----------|----------|---------|
| Model    | 15 | 4.3309883 | 0.288733 | 757.2077 | <.0001* |
| Error    | 48 | 0.0183030 | 0.000381 |          |         |
| C. Total | 63 | 4.3492913 |          |          |         |

| Source                | DF | SS        | MS       | F Ratio   | P-value |
|-----------------------|----|-----------|----------|-----------|---------|
| Species               | 3  | 3.9571017 | 1.319034 | 3459.1964 | <.0001* |
| Concentration         | 3  | 0.1894554 | 0.063152 | 165.6171  | <.0001* |
| Species*Concentration | 9  | 0.1844312 | 0.020492 | 53.7417   | <.0001* |

| Species            | Concentration                     | Species            | Concentration                       | DF | SE        | t-ratio | P-value       |
|--------------------|-----------------------------------|--------------------|-------------------------------------|----|-----------|---------|---------------|
| <i>Acomys</i>      | 0μM H <sub>2</sub> O <sub>2</sub> | <i>Acomys</i>      | 75μM H <sub>2</sub> O <sub>2</sub>  | 48 | 0.0138078 | 0.47    | <b>1.0000</b> |
| <i>Acomys</i>      | 0μM H <sub>2</sub> O <sub>2</sub> | <i>Acomys</i>      | 150μM H <sub>2</sub> O <sub>2</sub> | 48 | 0.0138078 | 0.08    | <b>1.0000</b> |
| <i>Acomys</i>      | 0μM H <sub>2</sub> O <sub>2</sub> | <i>Acomys</i>      | 300μM H <sub>2</sub> O <sub>2</sub> | 48 | 0.0138078 | -2.34   | <b>0.5965</b> |
| <i>Mus</i>         | 0μM H <sub>2</sub> O <sub>2</sub> | <i>Mus</i>         | 75μM H <sub>2</sub> O <sub>2</sub>  | 48 | 0.0138078 | -8.84   | <.0001*       |
| <i>Mus</i>         | 0μM H <sub>2</sub> O <sub>2</sub> | <i>Mus</i>         | 150μM H <sub>2</sub> O <sub>2</sub> | 48 | 0.0138078 | -16.05  | <.0001*       |
| <i>Mus</i>         | 0μM H <sub>2</sub> O <sub>2</sub> | <i>Mus</i>         | 300μM H <sub>2</sub> O <sub>2</sub> | 48 | 0.0138078 | -26.95  | <.0001*       |
| <i>Rattus</i>      | 0μM H <sub>2</sub> O <sub>2</sub> | <i>Rattus</i>      | 75μM H <sub>2</sub> O <sub>2</sub>  | 48 | 0.0138078 | -6.25   | <.0001*       |
| <i>Rattus</i>      | 0μM H <sub>2</sub> O <sub>2</sub> | <i>Rattus</i>      | 150μM H <sub>2</sub> O <sub>2</sub> | 48 | 0.0138078 | -9.25   | <.0001*       |
| <i>Rattus</i>      | 0μM H <sub>2</sub> O <sub>2</sub> | <i>Rattus</i>      | 300μM H <sub>2</sub> O <sub>2</sub> | 48 | 0.0138078 | -13.36  | <.0001*       |
| <i>Oryctolagus</i> | 0μM H <sub>2</sub> O <sub>2</sub> | <i>Oryctolagus</i> | 75μM H <sub>2</sub> O <sub>2</sub>  | 48 | 0.0138078 | -0.12   | <b>1.0000</b> |
| <i>Oryctolagus</i> | 0μM H <sub>2</sub> O <sub>2</sub> | <i>Oryctolagus</i> | 150μM H <sub>2</sub> O <sub>2</sub> | 48 | 0.0138078 | -0.42   | <b>1.0000</b> |
| <i>Oryctolagus</i> | 0μM H <sub>2</sub> O <sub>2</sub> | <i>Oryctolagus</i> | 300μM H <sub>2</sub> O <sub>2</sub> | 48 | 0.0138078 | -0.53   | <b>1.0000</b> |

## Supplementary Information

**Supplementary Table 21.** Two-way ANOVA table and effect test followed by Tukey-HSD post-hoc comparisons of passage 2 (P2) *Acomys*, *Mus*, *Rattus* and *Oryctolagus* H<sub>2</sub>O<sub>2</sub> treated fibroblasts cultured for 48hrs to test for differences in percent p19+ cells at 3% O<sub>2</sub>. *n* = 4/species

| Source   | DF | SS        | MS       | F Ratio   | P-value |
|----------|----|-----------|----------|-----------|---------|
| Model    | 15 | 5.7408201 | 0.382721 | 1064.6167 | <.0001* |
| Error    | 48 | 0.0172556 | 0.000359 |           |         |
| C. Total | 63 | 5.7580757 |          |           |         |

| Source                | DF | SS        | MS       | F Ratio   | P-value |
|-----------------------|----|-----------|----------|-----------|---------|
| Species               | 3  | 5.0459322 | 1.681977 | 4678.7599 | <.0001* |
| Concentration         | 3  | 0.3663475 | 0.122116 | 339.6899  | <.0001* |
| Species*Concentration | 9  | 0.3285404 | 0.036504 | 101.5446  | <.0001* |

| Species            | Concentration                     | Species            | Concentration                       | DF | SE        | t-ratio | P-value       |
|--------------------|-----------------------------------|--------------------|-------------------------------------|----|-----------|---------|---------------|
| <i>Acomys</i>      | 0μM H <sub>2</sub> O <sub>2</sub> | <i>Acomys</i>      | 75μM H <sub>2</sub> O <sub>2</sub>  | 48 | 0.0134069 | -0.44   | <b>1.0000</b> |
| <i>Acomys</i>      | 0μM H <sub>2</sub> O <sub>2</sub> | <i>Acomys</i>      | 150μM H <sub>2</sub> O <sub>2</sub> | 48 | 0.0134069 | -1.37   | <b>0.9899</b> |
| <i>Acomys</i>      | 0μM H <sub>2</sub> O <sub>2</sub> | <i>Acomys</i>      | 300μM H <sub>2</sub> O <sub>2</sub> | 48 | 0.0134069 | -1.68   | <b>0.9431</b> |
| <i>Mus</i>         | 0μM H <sub>2</sub> O <sub>2</sub> | <i>Mus</i>         | 75μM H <sub>2</sub> O <sub>2</sub>  | 48 | 0.0134069 | -10.47  | <.0001*       |
| <i>Mus</i>         | 0μM H <sub>2</sub> O <sub>2</sub> | <i>Mus</i>         | 150μM H <sub>2</sub> O <sub>2</sub> | 48 | 0.0134069 | -20.21  | <.0001*       |
| <i>Mus</i>         | 0μM H <sub>2</sub> O <sub>2</sub> | <i>Mus</i>         | 300μM H <sub>2</sub> O <sub>2</sub> | 48 | 0.0134069 | -32.59  | <.0001*       |
| <i>Rattus</i>      | 0μM H <sub>2</sub> O <sub>2</sub> | <i>Rattus</i>      | 75μM H <sub>2</sub> O <sub>2</sub>  | 48 | 0.0134069 | -9.43   | <.0001*       |
| <i>Rattus</i>      | 0μM H <sub>2</sub> O <sub>2</sub> | <i>Rattus</i>      | 150μM H <sub>2</sub> O <sub>2</sub> | 48 | 0.0134069 | -20.07  | <.0001*       |
| <i>Rattus</i>      | 0μM H <sub>2</sub> O <sub>2</sub> | <i>Rattus</i>      | 300μM H <sub>2</sub> O <sub>2</sub> | 48 | 0.0134069 | -25.48  | <.0001*       |
| <i>Oryctolagus</i> | 0μM H <sub>2</sub> O <sub>2</sub> | <i>Oryctolagus</i> | 75μM H <sub>2</sub> O <sub>2</sub>  | 48 | 0.0134069 | -0.18   | <b>1.0000</b> |
| <i>Oryctolagus</i> | 0μM H <sub>2</sub> O <sub>2</sub> | <i>Oryctolagus</i> | 150μM H <sub>2</sub> O <sub>2</sub> | 48 | 0.0134069 | -0.19   | <b>1.0000</b> |
| <i>Oryctolagus</i> | 0μM H <sub>2</sub> O <sub>2</sub> | <i>Oryctolagus</i> | 300μM H <sub>2</sub> O <sub>2</sub> | 48 | 0.0134069 | -0.42   | <b>1.0000</b> |

## Supplementary Information

**Supplementary Table 22.** Two-way ANOVA table and effect test followed by Tukey-HSD post-hoc comparisons of passage 2 (P2) *Acomys*, *Mus*, *Rattus* & *Oryctolagus* radiation treated fibroblasts cultured for 6hrs to test for differences in percent  $\gamma$ H2AX+ cells at 3% O<sub>2</sub>. *n* = 3/species

| Source   | DF | SS        | MS       | F Ratio  | P-value |
|----------|----|-----------|----------|----------|---------|
| Model    | 15 | 2.8277609 | 0.188517 | 2445.311 | <.0001* |
| Error    | 32 | 0.002467  | 0.000077 |          |         |
| C. Total | 47 | 2.8302279 |          |          |         |

| Source       | DF | SS        | MS        | F Ratio  | P-value |
|--------------|----|-----------|-----------|----------|---------|
| Species      | 3  | 0.9987643 | 0.3329214 | 4318.415 | <.0001* |
| Dose         | 3  | 1.723852  | 0.5746173 | 7453.519 | <.0001* |
| Species*Dose | 9  | 0.1051446 | 0.0116827 | 151.5399 | <.0001* |

| Species            | Dose | Species            | Dose  | DF | SE        | t-ratio | P-value       |
|--------------------|------|--------------------|-------|----|-----------|---------|---------------|
| <i>Acomys</i>      | 0 Gy | <i>Acomys</i>      | 5 Gy  | 32 | 0.0071691 | -3.59   | <b>0.0652</b> |
| <i>Acomys</i>      | 0 Gy | <i>Acomys</i>      | 15 Gy | 32 | 0.0071691 | -46.76  | <.0001*       |
| <i>Acomys</i>      | 0 Gy | <i>Acomys</i>      | 30 Gy | 32 | 0.0071691 | -54.41  | <.0001*       |
| <i>Mus</i>         | 0 Gy | <i>Mus</i>         | 5 Gy  | 32 | 0.0071691 | -36.26  | <.0001*       |
| <i>Mus</i>         | 0 Gy | <i>Mus</i>         | 15 Gy | 32 | 0.0071691 | -52.70  | <.0001*       |
| <i>Mus</i>         | 0 Gy | <i>Mus</i>         | 30 Gy | 32 | 0.0071691 | -68.32  | <.0001*       |
| <i>Rattus</i>      | 0 Gy | <i>Rattus</i>      | 5 Gy  | 32 | 0.0071691 | -34.72  | <.0001*       |
| <i>Rattus</i>      | 0 Gy | <i>Rattus</i>      | 15 Gy | 32 | 0.0071691 | -65.37  | <.0001*       |
| <i>Rattus</i>      | 0 Gy | <i>Rattus</i>      | 30 Gy | 32 | 0.0071691 | -81.78  | <.0001*       |
| <i>Oryctolagus</i> | 0 Gy | <i>Oryctolagus</i> | 5 Gy  | 32 | 0.0071691 | -3.33   | <b>0.1173</b> |
| <i>Oryctolagus</i> | 0 Gy | <i>Oryctolagus</i> | 15 Gy | 32 | 0.0071691 | -53.78  | <.0001*       |
| <i>Oryctolagus</i> | 0 Gy | <i>Oryctolagus</i> | 30 Gy | 32 | 0.0071691 | -58.32  | <.0001*       |

## Supplementary Information

**Supplementary Table 23.** Two-way ANOVA table and effect test followed by Tukey-HSD post-hoc comparisons of passage 2 (P2) *Acomys*, *Mus*, *Rattus* & *Oryctolagus* radiation treated fibroblasts cultured for 6hrs to test for differences in percent p21+ cells at 3% O<sub>2</sub>. *n* = 3/species

| Source   | DF | SS        | MS       | F Ratio  | P-value |
|----------|----|-----------|----------|----------|---------|
| Model    | 15 | 2.5593722 | 0.170625 | 2277.489 | <.0001* |
| Error    | 32 | 0.0023974 | 0.000075 |          |         |
| C. Total | 47 | 2.5617696 |          |          |         |

| Source       | DF | SS        | MS        | F Ratio  | P-value |
|--------------|----|-----------|-----------|----------|---------|
| Species      | 3  | 0.8422735 | 0.2807578 | 3747.538 | <.0001* |
| Dose         | 3  | 1.6559254 | 0.5519751 | 7367.729 | <.0001* |
| Species*Dose | 9  | 0.0611734 | 0.006797  | 90.7265  | <.0001* |

| Species            | Dose | Species            | Dose  | DF | SE        | t-ratio | P-value |
|--------------------|------|--------------------|-------|----|-----------|---------|---------|
| <i>Acomys</i>      | 0 Gy | <i>Acomys</i>      | 5 Gy  | 32 | 0.0070672 | -29.30  | <.0001* |
| <i>Acomys</i>      | 0 Gy | <i>Acomys</i>      | 15 Gy | 32 | 0.0070672 | -44.86  | <.0001* |
| <i>Acomys</i>      | 0 Gy | <i>Acomys</i>      | 30 Gy | 32 | 0.0070672 | -59.66  | <.0001* |
| <i>Mus</i>         | 0 Gy | <i>Mus</i>         | 5 Gy  | 32 | 0.0070672 | -44.14  | <.0001* |
| <i>Mus</i>         | 0 Gy | <i>Mus</i>         | 15 Gy | 32 | 0.0070672 | -63.57  | <.0001* |
| <i>Mus</i>         | 0 Gy | <i>Mus</i>         | 30 Gy | 32 | 0.0070672 | -87.03  | <.0001* |
| <i>Rattus</i>      | 0 Gy | <i>Rattus</i>      | 5 Gy  | 32 | 0.0070672 | -47.42  | <.0001* |
| <i>Rattus</i>      | 0 Gy | <i>Rattus</i>      | 15 Gy | 32 | 0.0070672 | -62.05  | <.0001* |
| <i>Rattus</i>      | 0 Gy | <i>Rattus</i>      | 30 Gy | 32 | 0.0070672 | -82.42  | <.0001* |
| <i>Oryctolagus</i> | 0 Gy | <i>Oryctolagus</i> | 5 Gy  | 32 | 0.0070672 | -26.76  | <.0001* |
| <i>Oryctolagus</i> | 0 Gy | <i>Oryctolagus</i> | 15 Gy | 32 | 0.0070672 | -39.95  | <.0001* |
| <i>Oryctolagus</i> | 0 Gy | <i>Oryctolagus</i> | 30 Gy | 32 | 0.0070672 | -57.04  | <.0001* |

## Supplementary Information

**Supplementary Table 24.** Two-way ANOVA table and effect test followed by Tukey-HSD post-hoc comparisons of passage 2 (P2) *Acomys*, *Mus*, *Rattus* & *Oryctolagus* radiation treated fibroblasts cultured for 6hrs to test for differences in percent p53+ cells at 3% O<sub>2</sub>. *n* = 3/species

| Source   | DF | SS        | MS       | F Ratio  | P-value |
|----------|----|-----------|----------|----------|---------|
| Model    | 15 | 2.656466  | 0.177098 | 3034.818 | <.0001* |
| Error    | 32 | 0.0018674 | 0.000058 |          |         |
| C. Total | 47 | 2.6583334 |          |          |         |

| Source       | DF | SS        | MS        | F Ratio  | P-value |
|--------------|----|-----------|-----------|----------|---------|
| Species      | 3  | 0.9043932 | 0.3014644 | 5166.014 | <.0001* |
| Dose         | 3  | 1.6722163 | 0.5574054 | 9551.922 | <.0001* |
| Species*Dose | 9  | 0.0798565 | 0.0088729 | 152.0504 | <.0001* |

| Species            | Dose | Species            | Dose  | DF | SE        | t-ratio | P-value |
|--------------------|------|--------------------|-------|----|-----------|---------|---------|
| <i>Acomys</i>      | 0 Gy | <i>Acomys</i>      | 5 Gy  | 32 | 0.0062373 | -30.70  | <.0001* |
| <i>Acomys</i>      | 0 Gy | <i>Acomys</i>      | 15 Gy | 32 | 0.0062373 | -48.11  | <.0001* |
| <i>Acomys</i>      | 0 Gy | <i>Acomys</i>      | 30 Gy | 32 | 0.0062373 | -64.45  | <.0001* |
| <i>Mus</i>         | 0 Gy | <i>Mus</i>         | 5 Gy  | 32 | 0.0062373 | -50.80  | <.0001* |
| <i>Mus</i>         | 0 Gy | <i>Mus</i>         | 15 Gy | 32 | 0.0062373 | -72.29  | <.0001* |
| <i>Mus</i>         | 0 Gy | <i>Mus</i>         | 30 Gy | 32 | 0.0062373 | -101.73 | <.0001* |
| <i>Rattus</i>      | 0 Gy | <i>Rattus</i>      | 5 Gy  | 32 | 0.0062373 | -54.77  | <.0001* |
| <i>Rattus</i>      | 0 Gy | <i>Rattus</i>      | 15 Gy | 32 | 0.0062373 | -72.41  | <.0001* |
| <i>Rattus</i>      | 0 Gy | <i>Rattus</i>      | 30 Gy | 32 | 0.0062373 | -96.36  | <.0001* |
| <i>Oryctolagus</i> | 0 Gy | <i>Oryctolagus</i> | 5 Gy  | 32 | 0.0062373 | -30.73  | <.0001* |
| <i>Oryctolagus</i> | 0 Gy | <i>Oryctolagus</i> | 15 Gy | 32 | 0.0062373 | -44.47  | <.0001* |
| <i>Oryctolagus</i> | 0 Gy | <i>Oryctolagus</i> | 30 Gy | 32 | 0.0062373 | -64.07  | <.0001* |

## Supplementary Information

**Supplementary Table 25.** Two-way ANOVA table and effect test followed by Tukey-HSD post-hoc comparisons of passage 2 (P2) *Acomys*, *Mus*, *Rattus* & *Oryctolagus* radiation treated fibroblasts cultured for 6hrs to test for differences in percent p16+ cells at 3% O<sub>2</sub>. n = 3/species

| Source   | DF | SS        | MS       | F Ratio  | P-value |
|----------|----|-----------|----------|----------|---------|
| Model    | 15 | 3.1812729 | 0.212085 | 1959.108 | <.0001* |
| Error    | 32 | 0.0034642 | 0.000108 |          |         |
| C. Total | 47 | 3.1847371 |          |          |         |

| Source       | DF | SS        | MS        | F Ratio  | P-value |
|--------------|----|-----------|-----------|----------|---------|
| Species      | 3  | 2.0864985 | 0.6954995 | 6424.591 | <.0001* |
| Dose         | 3  | 0.7682805 | 0.2560935 | 2365.632 | <.0001* |
| Species*Dose | 9  | 0.3264939 | 0.0362771 | 335.1053 | <.0001* |

| Species            | Dose | Species            | Dose  | DF | SE        | t-ratio | P-value       |
|--------------------|------|--------------------|-------|----|-----------|---------|---------------|
| <i>Acomys</i>      | 0 Gy | <i>Acomys</i>      | 5 Gy  | 32 | 0.0084953 | -3.01   | <b>0.2210</b> |
| <i>Acomys</i>      | 0 Gy | <i>Acomys</i>      | 15 Gy | 32 | 0.0084953 | -9.38   | <.0001*       |
| <i>Acomys</i>      | 0 Gy | <i>Acomys</i>      | 30 Gy | 32 | 0.0084953 | -15.26  | <.0001*       |
| <i>Mus</i>         | 0 Gy | <i>Mus</i>         | 5 Gy  | 32 | 0.0084953 | -32.24  | <.0001*       |
| <i>Mus</i>         | 0 Gy | <i>Mus</i>         | 15 Gy | 32 | 0.0084953 | -49.21  | <.0001*       |
| <i>Mus</i>         | 0 Gy | <i>Mus</i>         | 30 Gy | 32 | 0.0084953 | -66.43  | <.0001*       |
| <i>Rattus</i>      | 0 Gy | <i>Rattus</i>      | 5 Gy  | 32 | 0.0084953 | -36.92  | <.0001*       |
| <i>Rattus</i>      | 0 Gy | <i>Rattus</i>      | 15 Gy | 32 | 0.0084953 | -47.68  | <.0001*       |
| <i>Rattus</i>      | 0 Gy | <i>Rattus</i>      | 30 Gy | 32 | 0.0084953 | -67.45  | <.0001*       |
| <i>Oryctolagus</i> | 0 Gy | <i>Oryctolagus</i> | 5 Gy  | 32 | 0.0084953 | -3.56   | <b>0.0705</b> |
| <i>Oryctolagus</i> | 0 Gy | <i>Oryctolagus</i> | 15 Gy | 32 | 0.0084953 | -9.20   | <.0001*       |
| <i>Oryctolagus</i> | 0 Gy | <i>Oryctolagus</i> | 30 Gy | 32 | 0.0084953 | -13.33  | <.0001*       |

## Supplementary Information

**Supplementary Table 26.** Two-way ANOVA table and effect test followed by Tukey-HSD post-hoc comparisons of passage 2 (P2) *Acomys*, *Mus*, *Rattus* & *Oryctolagus* radiation treated fibroblasts cultured for 6hrs to test for differences in percent p19+ cells at 3% O<sub>2</sub>. *n* = 3/species

| Source   | DF | SS        | MS       | F Ratio  | P-value |
|----------|----|-----------|----------|----------|---------|
| Model    | 15 | 3.4880324 | 0.232535 | 4699.023 | <.0001* |
| Error    | 32 | 0.0015835 | 0.000049 |          |         |
| C. Total | 47 | 3.489616  |          |          |         |

| Source       | DF | SS        | MS        | F Ratio  | P-value |
|--------------|----|-----------|-----------|----------|---------|
| Species      | 3  | 2.345844  | 0.781948  | 15801.42 | <.0001* |
| Dose         | 3  | 0.7415837 | 0.2471946 | 4995.25  | <.0001* |
| Species*Dose | 9  | 0.4006048 | 0.0445116 | 899.4808 | <.0001* |

| Species            | Dose | Species            | Dose  | DF | SE        | t-ratio | P-value       |
|--------------------|------|--------------------|-------|----|-----------|---------|---------------|
| <i>Acomys</i>      | 0 Gy | <i>Acomys</i>      | 5 Gy  | 32 | 0.0057437 | -3.51   | <b>0.0782</b> |
| <i>Acomys</i>      | 0 Gy | <i>Acomys</i>      | 15 Gy | 32 | 0.0057437 | -6.37   | <.0001*       |
| <i>Acomys</i>      | 0 Gy | <i>Acomys</i>      | 30 Gy | 32 | 0.0057437 | -18.19  | <.0001*       |
| <i>Mus</i>         | 0 Gy | <i>Mus</i>         | 5 Gy  | 32 | 0.0057437 | -51.35  | <.0001*       |
| <i>Mus</i>         | 0 Gy | <i>Mus</i>         | 15 Gy | 32 | 0.0057437 | -76.71  | <.0001*       |
| <i>Mus</i>         | 0 Gy | <i>Mus</i>         | 30 Gy | 32 | 0.0057437 | -99.27  | <.0001*       |
| <i>Rattus</i>      | 0 Gy | <i>Rattus</i>      | 5 Gy  | 32 | 0.0057437 | -52.68  | <.0001*       |
| <i>Rattus</i>      | 0 Gy | <i>Rattus</i>      | 15 Gy | 32 | 0.0057437 | -76.51  | <.0001*       |
| <i>Rattus</i>      | 0 Gy | <i>Rattus</i>      | 30 Gy | 32 | 0.0057437 | -102.93 | <.0001*       |
| <i>Oryctolagus</i> | 0 Gy | <i>Oryctolagus</i> | 5 Gy  | 32 | 0.0057437 | -3.68   | <b>0.0529</b> |
| <i>Oryctolagus</i> | 0 Gy | <i>Oryctolagus</i> | 15 Gy | 32 | 0.0057437 | -7.44   | <.0001*       |
| <i>Oryctolagus</i> | 0 Gy | <i>Oryctolagus</i> | 30 Gy | 32 | 0.0057437 | -16.17  | <.0001*       |

## Supplementary Information

**Supplementary Table 27.** ANOVA table and effect test followed by t test multiple comparisons of passage 2 (P2) *Acomys*, *Mus*, *Rattus* & *Oryctolagus* H<sub>2</sub>O<sub>2</sub> treated fibroblasts cells to test for differences in basal respiration of mitochondria. *n* = 6/species

| Source   | DF | SS        | MS      | F Ratio | P-value |
|----------|----|-----------|---------|---------|---------|
| Model    | 7  | 39412.846 | 5630.41 | 15.8779 | <.0001* |
| Error    | 40 | 14184.292 | 354.61  |         |         |
| C. Total | 47 | 53597.138 |         |         |         |

| Source                | DF | SS | MS        | F Ratio | P-value       |
|-----------------------|----|----|-----------|---------|---------------|
| Species               | 3  | 3  | 31981.751 | 30.0631 | <.0001*       |
| concentration         | 1  | 1  | 4495.172  | 12.6765 | 0.0010*       |
| Species*concentration | 3  | 3  | 2935.924  | 2.7598  | <b>0.0546</b> |

| Species            | Concentration                     | Species            | Concentration                       | DF | SE       | t-ratio | P-value       |
|--------------------|-----------------------------------|--------------------|-------------------------------------|----|----------|---------|---------------|
| <i>Acomys</i>      | 0μM H <sub>2</sub> O <sub>2</sub> | <i>Acomys</i>      | 300μM H <sub>2</sub> O <sub>2</sub> | 40 | 10.87209 | 0.41    | <b>0.6876</b> |
| <i>Mus</i>         | 0μM H <sub>2</sub> O <sub>2</sub> | <i>Mus</i>         | 300μM H <sub>2</sub> O <sub>2</sub> | 40 | 10.87209 | 2.36    | 0.0232*       |
| <i>Rattus</i>      | 0μM H <sub>2</sub> O <sub>2</sub> | <i>Rattus</i>      | 300μM H <sub>2</sub> O <sub>2</sub> | 40 | 10.87209 | 3.87    | .0004*        |
| <i>Oryctolagus</i> | 0μM H <sub>2</sub> O <sub>2</sub> | <i>Oryctolagus</i> | 300μM H <sub>2</sub> O <sub>2</sub> | 40 | 10.87209 | 0.48    | <b>0.6311</b> |



## Supplementary Information

**Supplementary Table 28.** ANOVA table and effect test followed by t test multiple comparisons of passage 2 (P2) *Acomys*, *Mus*, *Rattus* & *Oryctolagus* H<sub>2</sub>O<sub>2</sub> treated fibroblasts cells to test for differences in ATP production of mitochondria. *n* = 6/species

| Source   | DF | SS        | MS      | F Ratio | P-value |
|----------|----|-----------|---------|---------|---------|
| Model    | 7  | 36563.875 | 5223.41 | 25.2168 | <.0001* |
| Error    | 40 | 8285.617  | 207.14  |         |         |
| C. Total | 47 | 44849.492 |         |         |         |

| Source                | DF | SS | MS        | F Ratio | P-value |
|-----------------------|----|----|-----------|---------|---------|
| Species               | 3  | 3  | 23282.918 | 37.4672 | <.0001* |
| concentration         | 1  | 1  | 6503.979  | 31.3989 | <.0001* |
| Species*concentration | 3  | 3  | 6776.978  | 10.9056 | <.0001* |

| Species            | Concentration                     | Species            | Concentration                       | DF | SE       | t-ratio | P-value       |
|--------------------|-----------------------------------|--------------------|-------------------------------------|----|----------|---------|---------------|
| <i>Acomys</i>      | 0μM H <sub>2</sub> O <sub>2</sub> | <i>Acomys</i>      | 300μM H <sub>2</sub> O <sub>2</sub> | 40 | 8.309441 | 0.35    | <b>0.7296</b> |
| <i>Mus</i>         | 0μM H <sub>2</sub> O <sub>2</sub> | <i>Mus</i>         | 300μM H <sub>2</sub> O <sub>2</sub> | 40 | 8.309441 | 2.88    | 0.0064*       |
| <i>Rattus</i>      | 0μM H <sub>2</sub> O <sub>2</sub> | <i>Rattus</i>      | 300μM H <sub>2</sub> O <sub>2</sub> | 40 | 8.309441 | 7.44    | <.0001*       |
| <i>Oryctolagus</i> | 0μM H <sub>2</sub> O <sub>2</sub> | <i>Oryctolagus</i> | 300μM H <sub>2</sub> O <sub>2</sub> | 40 | 8.309441 | 0.54    | <b>0.5955</b> |

## Supplementary Information

**Supplementary Table 29.** ANOVA table and effect test followed by t test multiple comparisons of passage 2 (P2) *Acomys*, *Mus*, *Rattus* & *Oryctolagus* H<sub>2</sub>O<sub>2</sub> treated fibroblasts cells to test for differences in maximal respiration of mitochondria. *n* = 6/species

| Source   | DF | SS        | MS      | F Ratio | P-value |
|----------|----|-----------|---------|---------|---------|
| Model    | 7  | 375941.61 | 53705.9 | 20.2582 | <.0001* |
| Error    | 40 | 106042.79 | 2651.1  |         |         |
| C. Total | 47 | 481984.40 |         |         |         |

| Source                | DF | SS | MS        | F Ratio | P-value |
|-----------------------|----|----|-----------|---------|---------|
| Species               | 3  | 3  | 281276.65 | 35.3664 | <.0001* |
| concentration         | 1  | 1  | 54210.55  | 20.4486 | <.0001* |
| Species*concentration | 3  | 3  | 40454.40  | 5.0866  | 0.0045* |

| Species            | Concentration                     | Species            | Concentration                       | DF | SE       | t-ratio | P-value       |
|--------------------|-----------------------------------|--------------------|-------------------------------------|----|----------|---------|---------------|
| <i>Acomys</i>      | 0μM H <sub>2</sub> O <sub>2</sub> | <i>Acomys</i>      | 300μM H <sub>2</sub> O <sub>2</sub> | 40 | 29.72692 | 0.09    | <b>0.9288</b> |
| <i>Mus</i>         | 0μM H <sub>2</sub> O <sub>2</sub> | <i>Mus</i>         | 300μM H <sub>2</sub> O <sub>2</sub> | 40 | 29.72692 | 3.22    | 0.0026*       |
| <i>Rattus</i>      | 0μM H <sub>2</sub> O <sub>2</sub> | <i>Rattus</i>      | 300μM H <sub>2</sub> O <sub>2</sub> | 40 | 29.72692 | 4.98    | <.0001*       |
| <i>Oryctolagus</i> | 0μM H <sub>2</sub> O <sub>2</sub> | <i>Oryctolagus</i> | 300μM H <sub>2</sub> O <sub>2</sub> | 40 | 29.72692 | 0.76    | <b>0.4514</b> |

## Supplementary Information

**Supplementary Table 30.** ANOVA table and effect test followed by t test multiple comparisons of passage 2 (P2) *Acomys*, *Mus*, *Rattus* & *Oryctolagus* H<sub>2</sub>O<sub>2</sub> treated fibroblasts cells to test for differences in spare respiratory capacity of mitochondria. *n* = 6/species

| Source   | DF | SS        | MS      | F Ratio | P-value |
|----------|----|-----------|---------|---------|---------|
| Model    | 7  | 176561.91 | 25223.1 | 15.0920 | <.0001* |
| Error    | 40 | 66851.81  | 1671.3  |         |         |
| C. Total | 47 | 243413.73 |         |         |         |

| Source                | DF | SS | MS        | F Ratio | P-value |
|-----------------------|----|----|-----------|---------|---------|
| Species               | 3  | 3  | 127231.96 | 25.3759 | <.0001* |
| concentration         | 1  | 1  | 27712.43  | 16.5814 | 0.0002* |
| Species*concentration | 3  | 3  | 21617.52  | 4.3115  | 0.0100* |

| Species            | Concentration                     | Species            | Concentration                       | DF | SE       | t-ratio | P-value       |
|--------------------|-----------------------------------|--------------------|-------------------------------------|----|----------|---------|---------------|
| <i>Acomys</i>      | 0μM H <sub>2</sub> O <sub>2</sub> | <i>Acomys</i>      | 300μM H <sub>2</sub> O <sub>2</sub> | 40 | 23.60293 | -0.08   | <b>0.9356</b> |
| <i>Mus</i>         | 0μM H <sub>2</sub> O <sub>2</sub> | <i>Mus</i>         | 300μM H <sub>2</sub> O <sub>2</sub> | 40 | 23.60293 | 2.96    | 0.0051*       |
| <i>Rattus</i>      | 0μM H <sub>2</sub> O <sub>2</sub> | <i>Rattus</i>      | 300μM H <sub>2</sub> O <sub>2</sub> | 40 | 23.60293 | 4.49    | <.0001*       |
| <i>Oryctolagus</i> | 0μM H <sub>2</sub> O <sub>2</sub> | <i>Oryctolagus</i> | 300μM H <sub>2</sub> O <sub>2</sub> | 40 | 23.60293 | 0.78    | <b>0.4420</b> |

## Supplementary Information

**Supplementary Table 31.** ANOVA table and effect test followed by t test multiple comparisons of isolated mitochondria samples from H<sub>2</sub>O<sub>2</sub> treated fibroblasts cells of passage 2 (P2) *Acomys*, *Mus*, *Rattus* & *Oryctolagus* to test for differences in State III respiration rate of isolated mitochondria.  $n = 3/\text{species}$

| Source   | DF | SS        | MS      | F Ratio | P-value |
|----------|----|-----------|---------|---------|---------|
| Model    | 7  | 220184.06 | 31454.9 | 19.1281 | <.0001* |
| Error    | 16 | 26310.87  | 1644.4  |         |         |
| C. Total | 23 | 246494.93 |         |         |         |

| Source                | DF | SS | MS        | F Ratio | P-value       |
|-----------------------|----|----|-----------|---------|---------------|
| Species               | 3  | 3  | 197383.62 | 40.0106 | <.0001*       |
| concentration         | 1  | 1  | 11494.22  | 6.9898  | 0.0177*       |
| Species*concentration | 3  | 3  | 11306.22  | 2.2918  | <b>0.1172</b> |

| Species            | Concentration                           | Species            | Concentration                             | DF | SE       | t-ratio | P-value       |
|--------------------|-----------------------------------------|--------------------|-------------------------------------------|----|----------|---------|---------------|
| <i>Acomys</i>      | 0 $\mu$ M H <sub>2</sub> O <sub>2</sub> | <i>Acomys</i>      | 300 $\mu$ M H <sub>2</sub> O <sub>2</sub> | 16 | 33.11022 | 0.04    | <b>0.9676</b> |
| <i>Mus</i>         | 0 $\mu$ M H <sub>2</sub> O <sub>2</sub> | <i>Mus</i>         | 300 $\mu$ M H <sub>2</sub> O <sub>2</sub> | 16 | 33.11022 | 2.39    | 0.0292*       |
| <i>Rattus</i>      | 0 $\mu$ M H <sub>2</sub> O <sub>2</sub> | <i>Rattus</i>      | 300 $\mu$ M H <sub>2</sub> O <sub>2</sub> | 16 | 33.11022 | 2.85    | 0.0116*       |
| <i>Oryctolagus</i> | 0 $\mu$ M H <sub>2</sub> O <sub>2</sub> | <i>Oryctolagus</i> | 300 $\mu$ M H <sub>2</sub> O <sub>2</sub> | 16 | 33.11022 | 0.00    | <b>0.9996</b> |

## Supplementary Information

**Supplementary Table 32.** ANOVA table and effect test followed by t test multiple comparisons of isolated mitochondria samples from H<sub>2</sub>O<sub>2</sub> treated fibroblasts cells of passage 2 (P2) *Acomys*, *Mus*, *Rattus* & *Oryctolagus* to test for differences in RCR of isolated mitochondria. *n* = 3/species

| Source   | DF | SS        | MS      | F Ratio | P-value |
|----------|----|-----------|---------|---------|---------|
| Model    | 7  | 183.78151 | 26.2545 | 19.1558 | <.0001* |
| Error    | 16 | 21.92925  | 1.3706  |         |         |
| C. Total | 23 | 205.71076 |         |         |         |

| Source                | DF | SS | MS        | F Ratio | P-value       |
|-----------------------|----|----|-----------|---------|---------------|
| Species               | 3  | 3  | 158.40913 | 38.5261 | <.0001*       |
| concentration         | 1  | 1  | 15.71894  | 11.4688 | 0.0038*       |
| Species*concentration | 3  | 3  | 9.65343   | 2.3478  | <b>0.1112</b> |

| Species            | Concentration                     | Species            | Concentration                       | DF | SE        | t-ratio | P-value       |
|--------------------|-----------------------------------|--------------------|-------------------------------------|----|-----------|---------|---------------|
| <i>Acomys</i>      | 0μM H <sub>2</sub> O <sub>2</sub> | <i>Acomys</i>      | 300μM H <sub>2</sub> O <sub>2</sub> | 16 | 0.9558864 | 0.53    | <b>0.6005</b> |
| <i>Mus</i>         | 0μM H <sub>2</sub> O <sub>2</sub> | <i>Mus</i>         | 300μM H <sub>2</sub> O <sub>2</sub> | 16 | 0.9558864 | 3.41    | 0.0035*       |
| <i>Rattus</i>      | 0μM H <sub>2</sub> O <sub>2</sub> | <i>Rattus</i>      | 300μM H <sub>2</sub> O <sub>2</sub> | 16 | 0.9558864 | 2.55    | 0.0215*       |
| <i>Oryctolagus</i> | 0μM H <sub>2</sub> O <sub>2</sub> | <i>Oryctolagus</i> | 300μM H <sub>2</sub> O <sub>2</sub> | 16 | 0.9558864 | 0.28    | <b>0.7856</b> |

## Supplementary Information

**Supplementary Table 33.** Linear model (from 0.5hrs to 2.5hrs) followed by t test multiple comparisons of H<sub>2</sub>O<sub>2</sub> treatment on HyPer transfected cells of passage 2 (P2) *Acomys*, *Mus*, *Rattus* & *Oryctolagus* to test for differences in fluorescent intensities ratio (F/F<sub>0</sub>). *n* = 3/species

| Source           | DF | F Ratio  | P-value |
|------------------|----|----------|---------|
| Species          | 3  | 8.6390   | 0.0069* |
| Passages         | 1  | 622.5004 | <.0001* |
| Species*Passages | 3  | 3.9693   | 0.0137* |

| Species            | -Species           | DF | SE       | t-ratio | P-value       |
|--------------------|--------------------|----|----------|---------|---------------|
| <i>Acomys</i>      | <i>Mus</i>         | 12 | 0.068320 | 3.13    | 0.0139*       |
| <i>Acomys</i>      | <i>Rattus</i>      | 12 | 0.068320 | 4.18    | 0.0031*       |
| <i>Acomys</i>      | <i>Oryctolagus</i> | 12 | 0.068320 | 0.28    | <b>0.7840</b> |
| <i>Oryctolagus</i> | <i>Mus</i>         | 12 | 0.068320 | -2.85   | 0.0215*       |
| <i>Oryctolagus</i> | <i>Rattus</i>      | 12 | 0.068320 | 3.89    | 0.0045*       |
| <i>Mus</i>         | <i>Rattus</i>      | 12 | 0.068320 | -1.04   | <b>0.3246</b> |

## Supplementary Information

**Supplementary Table 34.** ANOVA table followed by t test multiple comparisons of fluorescent intensities ratio of H<sub>2</sub>O<sub>2</sub> treatment on HyPer transfected cells of passage 2 (P2) *Acomys*, *Mus*, *Rattus* & *Oryctolagus* between 0.5hrs to 4hrs. ANOVA table and t test multiple comparisons to check the significant changes after 2.5hrs, 4hrs and 4.5hrs among all the 4 species.  $n = 3/\text{species}$

### ANOVA table and t-test at 0.5hrs

| Source   | DF | SS         | MS       | F Ratio | P-value       |
|----------|----|------------|----------|---------|---------------|
| Species  | 3  | 0.05971265 | 0.019904 | 1.2153  | <b>0.3651</b> |
| Error    | 8  | 0.13101999 | 0.016377 |         |               |
| C. Total | 11 | 0.19073264 |          |         |               |

| Species            | -Species           | DF | SE        | t-ratio | P-value       |
|--------------------|--------------------|----|-----------|---------|---------------|
| <i>Acomys</i>      | <i>Mus</i>         | 12 | 0.1044908 | 1.51    | <b>0.1680</b> |
| <i>Acomys</i>      | <i>Rattus</i>      | 12 | 0.1044908 | 1.54    | <b>0.1610</b> |
| <i>Acomys</i>      | <i>Oryctolagus</i> | 12 | 0.1044908 | 0.42    | <b>0.6786</b> |
| <i>Oryctolagus</i> | <i>Mus</i>         | 12 | 0.1044908 | -1.08   | <b>0.3091</b> |
| <i>Oryctolagus</i> | <i>Rattus</i>      | 12 | 0.1044908 | 1.11    | <b>0.2973</b> |
| <i>Mus</i>         | <i>Rattus</i>      | 12 | 0.1044908 | 0.02    | <b>0.9778</b> |

### ANOVA table and t-test at 1 hr

| Source   | DF | SS         | MS       | F Ratio | P-value |
|----------|----|------------|----------|---------|---------|
| Species  | 3  | 0.23363763 | 0.077879 | 10.9944 | 0.0033* |
| Error    | 8  | 0.05666813 | 0.007084 |         |         |
| C. Total | 11 | 0.29030577 |          |         |         |

| Species            | -Species           | DF | SE        | t-ratio | P-value       |
|--------------------|--------------------|----|-----------|---------|---------------|
| <i>Acomys</i>      | <i>Mus</i>         | 12 | 0.0687193 | 3.07    | 0.0152*       |
| <i>Acomys</i>      | <i>Rattus</i>      | 12 | 0.0687193 | 4.89    | 0.0012*       |
| <i>Acomys</i>      | <i>Oryctolagus</i> | 12 | 0.0687193 | 0.28    | <b>0.7857</b> |
| <i>Oryctolagus</i> | <i>Mus</i>         | 12 | 0.0687193 | -2.79   | 0.0233*       |
| <i>Oryctolagus</i> | <i>Rattus</i>      | 12 | 0.0687193 | 4.61    | 0.0017*       |
| <i>Mus</i>         | <i>Rattus</i>      | 12 | 0.0687193 | 1.81    | <b>0.1065</b> |

## Supplementary Information

### ANOVA table and t-test at 1.5hrs

| Source   | DF | SS         | MS       | F Ratio | P-value |
|----------|----|------------|----------|---------|---------|
| Species  | 3  | 0.17146380 | 0.057155 | 7.5375  | 0.0102* |
| Error    | 8  | 0.06066138 | 0.007583 |         |         |
| C. Total | 11 | 0.23212518 |          |         |         |

| Species            | -Species           | DF | SE        | t-ratio | P-value       |
|--------------------|--------------------|----|-----------|---------|---------------|
| <i>Acomys</i>      | <i>Mus</i>         | 12 | 0.0710993 | 2.97    | 0.0177*       |
| <i>Acomys</i>      | <i>Rattus</i>      | 12 | 0.0710993 | 3.46    | 0.0085*       |
| <i>Acomys</i>      | <i>Oryctolagus</i> | 12 | 0.0710993 | -0.23   | <b>0.8186</b> |
| <i>Oryctolagus</i> | <i>Mus</i>         | 12 | 0.0710993 | -3.21   | 0.0124*       |
| <i>Oryctolagus</i> | <i>Rattus</i>      | 12 | 0.0710993 | 3.70    | 0.0060*       |
| <i>Mus</i>         | <i>Rattus</i>      | 12 | 0.0710993 | 0.49    | <b>0.6368</b> |

### ANOVA table and t-test at 2hrs

| Source   | DF | SS         | MS       | F Ratio | P-value |
|----------|----|------------|----------|---------|---------|
| Species  | 3  | 0.25438021 | 0.084793 | 12.5823 | 0.0021* |
| Error    | 8  | 0.05391295 | 0.006739 |         |         |
| C. Total | 11 | 0.30829317 |          |         |         |

| Species            | -Species           | DF | SE        | t-ratio | P-value       |
|--------------------|--------------------|----|-----------|---------|---------------|
| <i>Acomys</i>      | <i>Mus</i>         | 12 | 0.0670280 | 3.79    | 0.0053*       |
| <i>Acomys</i>      | <i>Rattus</i>      | 12 | 0.0670280 | 5.12    | 0.0009*       |
| <i>Acomys</i>      | <i>Oryctolagus</i> | 12 | 0.0670280 | 0.45    | <b>0.6584</b> |
| <i>Oryctolagus</i> | <i>Mus</i>         | 12 | 0.0670280 | -3.33   | 0.0103*       |
| <i>Oryctolagus</i> | <i>Rattus</i>      | 12 | 0.0670280 | 4.66    | 0.0016*       |
| <i>Mus</i>         | <i>Rattus</i>      | 12 | 0.0670280 | 1.33    | <b>0.2198</b> |



## Supplementary Information

### ANOVA table and t-test at 2.5hrs

| Source   | DF | SS         | MS       | F Ratio | P-value |
|----------|----|------------|----------|---------|---------|
| Species  | 3  | 0.25033576 | 0.083445 | 12.0277 | 0.0025* |
| Error    | 8  | 0.05550192 | 0.006938 |         |         |
| C. Total | 11 | 0.30583768 |          |         |         |

| Species            | -Species           | DF | SE        | t-ratio | P-value       |
|--------------------|--------------------|----|-----------|---------|---------------|
| <i>Acomys</i>      | <i>Mus</i>         | 12 | 0.0680085 | 3.45    | 0.0087*       |
| <i>Acomys</i>      | <i>Rattus</i>      | 12 | 0.0680085 | 5.01    | 0.0010*       |
| <i>Acomys</i>      | <i>Oryctolagus</i> | 12 | 0.0680085 | 0.27    | <b>0.7908</b> |
| <i>Oryctolagus</i> | <i>Mus</i>         | 12 | 0.0680085 | -3.17   | 0.0131*       |
| <i>Oryctolagus</i> | <i>Rattus</i>      | 12 | 0.0680085 | 4.74    | 0.0015*       |
| <i>Mus</i>         | <i>Rattus</i>      | 12 | 0.0680085 | 1.56    | <b>0.1563</b> |

### ANOVA table and t-test at 3hrs

| Source   | DF | SS         | MS       | F Ratio | P-value |
|----------|----|------------|----------|---------|---------|
| Species  | 3  | 0.21603515 | 0.072012 | 12.7642 | 0.0020* |
| Error    | 8  | 0.04513347 | 0.005642 |         |         |
| C. Total | 11 | 0.26116862 |          |         |         |

| Species            | -Species           | DF | SE        | t-ratio | P-value       |
|--------------------|--------------------|----|-----------|---------|---------------|
| <i>Acomys</i>      | <i>Mus</i>         | 12 | 0.0613280 | 3.49    | 0.0082*       |
| <i>Acomys</i>      | <i>Rattus</i>      | 12 | 0.0613280 | 5.05    | 0.0010*       |
| <i>Acomys</i>      | <i>Oryctolagus</i> | 12 | 0.0613280 | 0.07    | <b>0.9386</b> |
| <i>Oryctolagus</i> | <i>Mus</i>         | 12 | 0.0613280 | -3.41   | 0.0092*       |
| <i>Oryctolagus</i> | <i>Rattus</i>      | 12 | 0.0613280 | 4.97    | 0.0011*       |
| <i>Mus</i>         | <i>Rattus</i>      | 12 | 0.0613280 | 1.56    | <b>0.1564</b> |

## Supplementary Information

### ANOVA table and t-test at 3.5hrs

| Source   | DF | SS         | MS       | F Ratio | P-value |
|----------|----|------------|----------|---------|---------|
| Species  | 3  | 0.15282042 | 0.050940 | 9.7324  | 0.0048* |
| Error    | 8  | 0.04187277 | 0.005234 |         |         |
| C. Total | 11 | 0.19469318 |          |         |         |

| Species            | -Species           | DF | SE        | t-ratio | P-value       |
|--------------------|--------------------|----|-----------|---------|---------------|
| <i>Acomys</i>      | <i>Mus</i>         | 12 | 0.0590711 | 3.15    | 0.0135*       |
| <i>Acomys</i>      | <i>Rattus</i>      | 12 | 0.0590711 | 4.44    | 0.0022*       |
| <i>Acomys</i>      | <i>Oryctolagus</i> | 12 | 0.0590711 | 0.17    | <b>0.8644</b> |
| <i>Oryctolagus</i> | <i>Mus</i>         | 12 | 0.0590711 | 2.97    | 0.0177*       |
| <i>Oryctolagus</i> | <i>Rattus</i>      | 12 | 0.0590711 | 4.26    | 0.0027*       |
| <i>Mus</i>         | <i>Rattus</i>      | 12 | 0.0590711 | 1.28    | <b>0.2340</b> |

### ANOVA table and t-test at 4hrs

| Source   | DF | SS         | MS       | F Ratio | P-value |
|----------|----|------------|----------|---------|---------|
| Species  | 3  | 0.11812743 | 0.039376 | 14.4922 | 0.0013* |
| Error    | 8  | 0.02173626 | 0.002717 |         |         |
| C. Total | 11 | 0.13986369 |          |         |         |

| Species            | -Species           | DF | SE        | t-ratio | P-value       |
|--------------------|--------------------|----|-----------|---------|---------------|
| <i>Acomys</i>      | <i>Mus</i>         | 12 | 0.0425600 | 3.90    | 0.0045*       |
| <i>Acomys</i>      | <i>Rattus</i>      | 12 | 0.0425600 | 5.61    | 0.0005*       |
| <i>Acomys</i>      | <i>Oryctolagus</i> | 12 | 0.0425600 | 0.54    | <b>0.5989</b> |
| <i>Oryctolagus</i> | <i>Mus</i>         | 12 | 0.0425600 | -3.33   | 0.0100*       |
| <i>Oryctolagus</i> | <i>Rattus</i>      | 12 | 0.0425600 | 5.06    | 0.0010*       |
| <i>Mus</i>         | <i>Rattus</i>      | 12 | 0.0425600 | 1.71    | <b>0.1247</b> |

## Supplementary Information

### ANOVA table and t test multiple comparisons table

| Source   | DF  | SS        | MS       | F Ratio | P-value |
|----------|-----|-----------|----------|---------|---------|
| Species  | 51  | 8.4621935 | 0.165925 | 24.5918 | <.0001  |
| Error    | 104 | 0.7017067 | 0.006747 |         |         |
| C. Total | 155 | 9.1639002 |          |         |         |

| Species            | Time | Species            | Time   | DF  | SE        | t-ratio | P-value       |
|--------------------|------|--------------------|--------|-----|-----------|---------|---------------|
| <i>Acomys</i>      | 0hr  | <i>Acomys</i>      | 2.5hrs | 155 | 0.0670680 | -1.42   | <b>0.1592</b> |
| <i>Oryctolagus</i> | 0hr  | <i>Oryctolagus</i> | 2.5hrs | 155 | 0.0670680 | -1.70   | <b>0.0929</b> |
| <i>Mus</i>         | 0hr  | <i>Mus</i>         | 4hrs   | 155 | 0.0670680 | -3.06   | 0.0028*       |
| <i>Rattus</i>      | 0hr  | <i>Rattus</i>      | 4hrs   | 155 | 0.0670680 | -3.63   | 0.0004*       |
| <i>Mus</i>         | 0hr  | <i>Mus</i>         | 5hrs   | 155 | 0.0670680 | -1.74   | <b>0.0853</b> |
| <i>Rattus</i>      | 0hr  | <i>Rattus</i>      | 5hrs   | 155 | 0.0670680 | -1.91   | <b>0.0588</b> |

## Supplementary Information

**Supplementary Table 35.** Two-way ANOVA table and effect test followed by Tukey-HSD post-hoc comparisons of passage 2 (P2) *Acomys*, *Mus*, *Rattus* & *Oryctolagus* H<sub>2</sub>O<sub>2</sub> treated fibroblasts lysates to test for differences in catalase enzyme activity. We also compared regenerators and non-regenerators groups through LS Means test for changes in catalase activity.  $n = 3/\text{species}$

| Source   | DF | SS        | MS      | F Ratio | P-value |
|----------|----|-----------|---------|---------|---------|
| Model    | 7  | 23.010470 | 3.28721 | 97.7947 | <.0001* |
| Error    | 16 | 0.537814  | 0.03361 |         |         |
| C. Total | 23 | 23.548284 |         |         |         |

| Source                | DF | SS | MS        | F Ratio  | P-value |
|-----------------------|----|----|-----------|----------|---------|
| Species               | 3  | 3  | 0.393328  | 3.9005   | 0.0288* |
| concentration         | 1  | 1  | 21.901620 | 651.5749 | <.0001* |
| Species*concentration | 3  | 3  | 0.715522  | 7.0956   | 0.0030* |

| Species            | Concentration                           | Species            | Concentration                             | DF | SE        | t-ratio | P-value       |
|--------------------|-----------------------------------------|--------------------|-------------------------------------------|----|-----------|---------|---------------|
| <i>Acomys</i>      | 0 $\mu$ M H <sub>2</sub> O <sub>2</sub> | <i>Mus</i>         | 0 $\mu$ M H <sub>2</sub> O <sub>2</sub>   | 16 | 0.1496960 | -0.86   | <b>0.9854</b> |
| <i>Acomys</i>      | 0 $\mu$ M H <sub>2</sub> O <sub>2</sub> | <i>Rattus</i>      | 0 $\mu$ M H <sub>2</sub> O <sub>2</sub>   | 16 | 0.1496960 | 0.15    | <b>1.0000</b> |
| <i>Acomys</i>      | 0 $\mu$ M H <sub>2</sub> O <sub>2</sub> | <i>Oryctolagus</i> | 0 $\mu$ M H <sub>2</sub> O <sub>2</sub>   | 16 | 0.1496960 | 0.86    | <b>0.9862</b> |
| <i>Mus</i>         | 0 $\mu$ M H <sub>2</sub> O <sub>2</sub> | <i>Rattus</i>      | 0 $\mu$ M H <sub>2</sub> O <sub>2</sub>   | 16 | 0.1496960 | 1.01    | <b>0.9657</b> |
| <i>Mus</i>         | 0 $\mu$ M H <sub>2</sub> O <sub>2</sub> | <i>Oryctolagus</i> | 0 $\mu$ M H <sub>2</sub> O <sub>2</sub>   | 16 | 0.1496960 | 1.72    | <b>0.6754</b> |
| <i>Oryctolagus</i> | 0 $\mu$ M H <sub>2</sub> O <sub>2</sub> | <i>Rattus</i>      | 0 $\mu$ M H <sub>2</sub> O <sub>2</sub>   | 16 | 0.1496960 | -0.71   | <b>0.9955</b> |
| <i>Acomys</i>      | 0 $\mu$ M H <sub>2</sub> O <sub>2</sub> | <i>Acomys</i>      | 300 $\mu$ M H <sub>2</sub> O <sub>2</sub> | 16 | 0.1496960 | 10.23   | <.0001*       |
| <i>Mus</i>         | 0 $\mu$ M H <sub>2</sub> O <sub>2</sub> | <i>Mus</i>         | 300 $\mu$ M H <sub>2</sub> O <sub>2</sub> | 16 | 0.1496960 | 15.58   | <.0001*       |
| <i>Rattus</i>      | 0 $\mu$ M H <sub>2</sub> O <sub>2</sub> | <i>Rattus</i>      | 300 $\mu$ M H <sub>2</sub> O <sub>2</sub> | 16 | 0.1496960 | 14.48   | <.0001*       |
| <i>Oryctolagus</i> | 0 $\mu$ M H <sub>2</sub> O <sub>2</sub> | <i>Oryctolagus</i> | 300 $\mu$ M H <sub>2</sub> O <sub>2</sub> | 16 | 0.1496960 | 10.76   | <.0001*       |

| SS           | NumDF | Den DF | F Ratio | P-value |
|--------------|-------|--------|---------|---------|
| 0.6907673705 | 1     | 16     | 20.5504 | 0.0003* |

## Supplementary Information

**Supplementary Table 36.** Two-way ANOVA table and effect test followed by Tukey-HSD post-hoc comparisons of passage 2 (P2) *Acomys*, *Mus*, *Rattus* & *Oryctolagus* H<sub>2</sub>O<sub>2</sub> treated fibroblasts lysates to test for differences in GPx enzyme activity. We also compared regenerators and non-regenerators groups through LS Means test for changes in GPx activity. *n* = 3/species

| Source   | DF | SS        | MS      | F Ratio  | P-value |
|----------|----|-----------|---------|----------|---------|
| Model    | 7  | 162.55943 | 23.2228 | 172.3622 | <.0001* |
| Error    | 16 | 2.15572   | 0.1347  |          |         |
| C. Total | 23 | 164.71515 |         |          |         |

| Source                | DF | SS | MS        | F Ratio  | P-value |
|-----------------------|----|----|-----------|----------|---------|
| Species               | 3  | 3  | 36.32053  | 89.8584  | <.0001* |
| concentration         | 1  | 1  | 102.18336 | 758.4169 | <.0001* |
| Species*concentration | 3  | 3  | 24.05555  | 59.5144  | <.0001* |

| Species            | Concentration                     | Species            | Concentration                       | DF | SE        | t-ratio | P-value       |
|--------------------|-----------------------------------|--------------------|-------------------------------------|----|-----------|---------|---------------|
| <i>Acomys</i>      | 0μM H <sub>2</sub> O <sub>2</sub> | <i>Mus</i>         | 0μM H <sub>2</sub> O <sub>2</sub>   | 16 | 0.2997026 | 1.47    | <b>0.8128</b> |
| <i>Acomys</i>      | 0μM H <sub>2</sub> O <sub>2</sub> | <i>Rattus</i>      | 0μM H <sub>2</sub> O <sub>2</sub>   | 16 | 0.2997026 | 1.56    | <b>0.7634</b> |
| <i>Acomys</i>      | 0μM H <sub>2</sub> O <sub>2</sub> | <i>Oryctolagus</i> | 0μM H <sub>2</sub> O <sub>2</sub>   | 16 | 0.2997026 | -0.08   | <b>1.0000</b> |
| <i>Mus</i>         | 0μM H <sub>2</sub> O <sub>2</sub> | <i>Rattus</i>      | 0μM H <sub>2</sub> O <sub>2</sub>   | 16 | 0.2997026 | 0.10    | <b>1.0000</b> |
| <i>Mus</i>         | 0μM H <sub>2</sub> O <sub>2</sub> | <i>Oryctolagus</i> | 0μM H <sub>2</sub> O <sub>2</sub>   | 16 | 0.2997026 | -1.54   | <b>0.7744</b> |
| <i>Oryctolagus</i> | 0μM H <sub>2</sub> O <sub>2</sub> | <i>Rattus</i>      | 0μM H <sub>2</sub> O <sub>2</sub>   | 16 | 0.2997026 | 1.64    | <b>0.7218</b> |
| <i>Acomys</i>      | 0μM H <sub>2</sub> O <sub>2</sub> | <i>Acomys</i>      | 300μM H <sub>2</sub> O <sub>2</sub> | 16 | 0.2997026 | -22.00  | <.0001*       |
| <i>Mus</i>         | 0μM H <sub>2</sub> O <sub>2</sub> | <i>Mus</i>         | 300μM H <sub>2</sub> O <sub>2</sub> | 16 | 0.2997026 | -7.68   | <.0001*       |
| <i>Rattus</i>      | 0μM H <sub>2</sub> O <sub>2</sub> | <i>Rattus</i>      | 300μM H <sub>2</sub> O <sub>2</sub> | 16 | 0.2997026 | -6.72   | .0001*        |
| <i>Oryctolagus</i> | 0μM H <sub>2</sub> O <sub>2</sub> | <i>Oryctolagus</i> | 300μM H <sub>2</sub> O <sub>2</sub> | 16 | 0.2997026 | -18.68  | <.0001*       |

| SS    | NumDF | Den DF | F Ratio  | P-value |
|-------|-------|--------|----------|---------|
| 23.25 | 1     | 16     | 172.5647 | <.0001* |

## Supplementary Information

**Supplementary Table 37.** ANOVA table and t-test of 1hr pretreated NAC followed by 2hrs H<sub>2</sub>O<sub>2</sub> treated fibroblasts cells of passage 2 (P2) from *Mus* and *Rattus* to test for differences in basal respiration. *n* = 5/species

| Source   | DF | SS        | MS      | F Ratio | P-value |
|----------|----|-----------|---------|---------|---------|
| Model    | 2  | 1073.1596 | 536.580 | 5.9922  | 0.0157* |
| Error    | 12 | 1074.5647 | 89.547  |         |         |
| C. Total | 14 | 2147.7242 |         |         |         |

| Species    | Levels                                       | -Levels                                      | Difference | SE       | P-value       |
|------------|----------------------------------------------|----------------------------------------------|------------|----------|---------------|
| <i>Mus</i> | 0uM H <sub>2</sub> O <sub>2</sub>            | 300uM H <sub>2</sub> O <sub>2</sub>          | 20.67310   | 5.984883 | 0.0048*       |
| <i>Mus</i> | 0uM H <sub>2</sub> O <sub>2</sub>            | 2mM NAC +300uM H <sub>2</sub> O <sub>2</sub> | 11.52614   | 5.984883 | <b>0.0781</b> |
| <i>Mus</i> | 2mM NAC +300uM H <sub>2</sub> O <sub>2</sub> | 300uM H <sub>2</sub> O <sub>2</sub>          | 9.14696    | 5.984883 | <b>0.1523</b> |

| Source   | DF | SS        | MS      | F Ratio | P-value       |
|----------|----|-----------|---------|---------|---------------|
| Model    | 2  | 3316.722  | 1658.36 | 2.7081  | <b>0.1070</b> |
| Error    | 12 | 7348.536  | 612.38  |         |               |
| C. Total | 14 | 10665.258 |         |         |               |

| Species       | Levels                                       | -Levels                                      | Difference | SE       | P-value       |
|---------------|----------------------------------------------|----------------------------------------------|------------|----------|---------------|
| <i>Rattus</i> | 0uM H <sub>2</sub> O <sub>2</sub>            | 300uM H <sub>2</sub> O <sub>2</sub>          | 35.41301   | 15.65092 | 0.0430*       |
| <i>Rattus</i> | 0uM H <sub>2</sub> O <sub>2</sub>            | 2mM NAC +300uM H <sub>2</sub> O <sub>2</sub> | 25.08594   | 15.65092 | <b>0.1350</b> |
| <i>Rattus</i> | 2mM NAC +300uM H <sub>2</sub> O <sub>2</sub> | 300uM H <sub>2</sub> O <sub>2</sub>          | 10.32707   | 15.65092 | <b>0.5218</b> |

## Supplementary Information

**Supplementary Table 38.** ANOVA table and t-test of 1hr pretreated NAC followed by 2hrs H<sub>2</sub>O<sub>2</sub> treated fibroblasts cells of passage 2 (P2) from *Mus* and *Rattus* to test for differences in Maximal respiration. *n* = 5/species

| Source   | DF | SS        | MS      | F Ratio | P-value |
|----------|----|-----------|---------|---------|---------|
| Model    | 2  | 37354.409 | 18677.2 | 8.5244  | 0.0050* |
| Error    | 12 | 26292.324 | 2191.0  |         |         |
| C. Total | 14 | 63646.734 |         |         |         |

| Species    | Levels                                       | -Levels                                      | Difference | SE       | P-value       |
|------------|----------------------------------------------|----------------------------------------------|------------|----------|---------------|
| <i>Mus</i> | 0uM H <sub>2</sub> O <sub>2</sub>            | 300uM H <sub>2</sub> O <sub>2</sub>          | 121.8965   | 29.60424 | 0.0014*       |
| <i>Mus</i> | 0uM H <sub>2</sub> O <sub>2</sub>            | 2mM NAC +300uM H <sub>2</sub> O <sub>2</sub> | 68.8380    | 29.60424 | 0.0384*       |
| <i>Mus</i> | 2mM NAC +300uM H <sub>2</sub> O <sub>2</sub> | 300uM H <sub>2</sub> O <sub>2</sub>          | 53.0585    | 29.60424 | <b>0.0983</b> |

| Source   | DF | SS        | MS      | F Ratio | P-value |
|----------|----|-----------|---------|---------|---------|
| Model    | 2  | 44973.912 | 22487.0 | 7.6320  | 0.0073* |
| Error    | 12 | 35356.757 | 2946.4  |         |         |
| C. Total | 14 | 80330.669 |         |         |         |

| Species       | Levels                                       | -Levels                                      | Difference | SE       | P-value       |
|---------------|----------------------------------------------|----------------------------------------------|------------|----------|---------------|
| <i>Rattus</i> | 0uM H <sub>2</sub> O <sub>2</sub>            | 300uM H <sub>2</sub> O <sub>2</sub>          | 124.4036   | 34.33014 | 0.0035*       |
| <i>Rattus</i> | 0uM H <sub>2</sub> O <sub>2</sub>            | 2mM NAC +300uM H <sub>2</sub> O <sub>2</sub> | 18.7853    | 34.33014 | <b>0.5943</b> |
| <i>Rattus</i> | 2mM NAC +300uM H <sub>2</sub> O <sub>2</sub> | 300uM H <sub>2</sub> O <sub>2</sub>          | 105.6182   | 34.33014 | 0.0096*       |

## Supplementary Information

**Supplementary Table 39.** ANOVA table and t-test of pretreated NAC followed by H<sub>2</sub>O<sub>2</sub> treated fibroblasts cells of passage 2 (P2) from *Mus* and *Rattus* to test for differences in ATP production respiration.  $n = 5/\text{species}$

| Source   | DF | SS        | MS      | F Ratio | P-value |
|----------|----|-----------|---------|---------|---------|
| Model    | 2  | 1507.5296 | 753.765 | 10.5917 | 0.0022* |
| Error    | 12 | 853.9838  | 71.165  |         |         |
| C. Total | 14 | 2361.5135 |         |         |         |

| Species    | Levels                                       | -Levels                                      | Difference | SE       | P-value       |
|------------|----------------------------------------------|----------------------------------------------|------------|----------|---------------|
| <i>Mus</i> | 0uM H <sub>2</sub> O <sub>2</sub>            | 300uM H <sub>2</sub> O <sub>2</sub>          | 24.39231   | 5.335366 | 0.0006*       |
| <i>Mus</i> | 0uM H <sub>2</sub> O <sub>2</sub>            | 2mM NAC +300uM H <sub>2</sub> O <sub>2</sub> | 9.74255    | 5.335366 | <b>0.0928</b> |
| <i>Mus</i> | 2mM NAC +300uM H <sub>2</sub> O <sub>2</sub> | 300uM H <sub>2</sub> O <sub>2</sub>          | 14.64976   | 5.335366 | 0.0177*       |

| Source   | DF | SS        | MS      | F Ratio | P-value |
|----------|----|-----------|---------|---------|---------|
| Model    | 2  | 13983.723 | 6991.86 | 11.1963 | 0.0018* |
| Error    | 12 | 7493.732  | 624.48  |         |         |
| C. Total | 14 | 21477.455 |         |         |         |

| Species       | Levels                                       | -Levels                                      | Difference | SE       | P-value       |
|---------------|----------------------------------------------|----------------------------------------------|------------|----------|---------------|
| <i>Rattus</i> | 0uM H <sub>2</sub> O <sub>2</sub>            | 300uM H <sub>2</sub> O <sub>2</sub>          | 74.28443   | 15.80478 | 0.0005*       |
| <i>Rattus</i> | 0uM H <sub>2</sub> O <sub>2</sub>            | 2mM NAC +300uM H <sub>2</sub> O <sub>2</sub> | 29.62661   | 15.80478 | <b>0.0854</b> |
| <i>Rattus</i> | 2mM NAC +300uM H <sub>2</sub> O <sub>2</sub> | 300uM H <sub>2</sub> O <sub>2</sub>          | 44.65782   | 15.80478 | 0.0153*       |



## Supplementary Information

**Supplementary Table 40.** ANOVA table and t-test of 1hr pretreated NAC followed by 2hrs H<sub>2</sub>O<sub>2</sub> treated fibroblasts cells of passage 2 (P2) from *Mus* and *Rattus* to test for differences in Spare respiratory capacity. *n* = 5/species

| Source   | DF | SS        | MS      | F Ratio | P-value |
|----------|----|-----------|---------|---------|---------|
| Model    | 2  | 17600.694 | 8800.35 | 4.2258  | 0.0408* |
| Error    | 12 | 24990.343 | 2082.53 |         |         |
| C. Total | 14 | 42591.037 |         |         |         |

| Species    | Levels                                       | -Levels                                      | Difference | SE       | P-value       |
|------------|----------------------------------------------|----------------------------------------------|------------|----------|---------------|
| <i>Mus</i> | 0uM H <sub>2</sub> O <sub>2</sub>            | 300uM H <sub>2</sub> O <sub>2</sub>          | 83.24828   | 28.86194 | 0.0137*       |
| <i>Mus</i> | 0uM H <sub>2</sub> O <sub>2</sub>            | 2mM NAC +300uM H <sub>2</sub> O <sub>2</sub> | 32.54110   | 28.86194 | <b>0.2816</b> |
| <i>Mus</i> | 2mM NAC +300uM H <sub>2</sub> O <sub>2</sub> | 300uM H <sub>2</sub> O <sub>2</sub>          | 50.70717   | 28.86194 | <b>0.1044</b> |

| Source   | DF | SS        | MS      | F Ratio | P-value |
|----------|----|-----------|---------|---------|---------|
| Model    | 2  | 50636.361 | 25318.2 | 14.4430 | 0.0006* |
| Error    | 12 | 21035.673 | 1753.0  |         |         |
| C. Total | 14 | 71672.034 |         |         |         |

| Species       | Levels                                       | -Levels                                      | Difference | SE       | P-value       |
|---------------|----------------------------------------------|----------------------------------------------|------------|----------|---------------|
| <i>Rattus</i> | 0uM H <sub>2</sub> O <sub>2</sub>            | 300uM H <sub>2</sub> O <sub>2</sub>          | 137.4766   | 26.47998 | 0.0002*       |
| <i>Rattus</i> | 0uM H <sub>2</sub> O <sub>2</sub>            | 2mM NAC +300uM H <sub>2</sub> O <sub>2</sub> | 36.8629    | 26.47998 | <b>0.1892</b> |
| <i>Rattus</i> | 2mM NAC +300uM H <sub>2</sub> O <sub>2</sub> | 300uM H <sub>2</sub> O <sub>2</sub>          | 100.6137   | 26.47998 | 0.0025*       |

## Supplementary Information

**Supplementary Table 41.** ANOVA table and t-test of 1hr pretreated NAC followed by 2hrs H<sub>2</sub>O<sub>2</sub> treated fibroblasts cells of passage 2 (P2) from *Mus* and *Rattus* to test for differences in %p21+ cells. *n* = 5/species

| Source   | DF | SS        | MS      | F Ratio   | P-value |
|----------|----|-----------|---------|-----------|---------|
| Model    | 2  | 6801.2793 | 3400.64 | 1309.3470 | <.0001* |
| Error    | 9  | 23.3748   | 2.60    |           |         |
| C. Total | 11 | 6824.6541 |         |           |         |

| Species    | Levels                                       | -Levels                                      | Difference | SE       | P-value |
|------------|----------------------------------------------|----------------------------------------------|------------|----------|---------|
| <i>Mus</i> | 0uM H <sub>2</sub> O <sub>2</sub>            | 300uM H <sub>2</sub> O <sub>2</sub>          | 52.66000   | 1.139562 | <.0001* |
| <i>Mus</i> | 0uM H <sub>2</sub> O <sub>2</sub>            | 2mM NAC +300uM H <sub>2</sub> O <sub>2</sub> | 4.63500    | 1.139562 | 0.0071* |
| <i>Mus</i> | 2mM NAC +300uM H <sub>2</sub> O <sub>2</sub> | 300uM H <sub>2</sub> O <sub>2</sub>          | 48.02500   | 1.139562 | <.0001* |

| Source   | DF | SS        | MS      | F Ratio  | P-value |
|----------|----|-----------|---------|----------|---------|
| Model    | 2  | 4275.3534 | 2137.68 | 258.1558 | <.0001* |
| Error    | 9  | 74.5251   | 8.28    |          |         |
| C. Total | 11 | 4349.8785 |         |          |         |

| Species       | Levels                                       | -Levels                                      | Difference | SE       | P-value       |
|---------------|----------------------------------------------|----------------------------------------------|------------|----------|---------------|
| <i>Rattus</i> | 0uM H <sub>2</sub> O <sub>2</sub>            | 300uM H <sub>2</sub> O <sub>2</sub>          | 42.25500   | 2.034769 | <.0001*       |
| <i>Rattus</i> | 0uM H <sub>2</sub> O <sub>2</sub>            | 2mM NAC +300uM H <sub>2</sub> O <sub>2</sub> | 4.87500    | 2.034769 | <b>0.0924</b> |
| <i>Rattus</i> | 2mM NAC +300uM H <sub>2</sub> O <sub>2</sub> | 300uM H <sub>2</sub> O <sub>2</sub>          | 37.38000   | 2.034769 | <.0001*       |

## Supplementary Information

**Supplementary Table 42.** ANOVA table and t-test of 1hr pretreated NAC followed by 2hrs by H<sub>2</sub>O<sub>2</sub> treated fibroblasts cells of passage 2 (P2) from *Mus* and *Rattus* to test for differences in % SA $\beta$ -gal+ cells. *n* = 5/species

| Source   | DF | SS        | MS      | F Ratio  | P-value |
|----------|----|-----------|---------|----------|---------|
| Model    | 2  | 2351.2193 | 1175.61 | 669.5451 | <.0001* |
| Error    | 9  | 15.8025   | 1.76    |          |         |
| C. Total | 11 | 2367.0218 |         |          |         |

| Species    | Levels                                       | -Levels                                      | Difference | SE        | P-value       |
|------------|----------------------------------------------|----------------------------------------------|------------|-----------|---------------|
| <i>Mus</i> | 0uM H <sub>2</sub> O <sub>2</sub>            | 300uM H <sub>2</sub> O <sub>2</sub>          | 30.62500   | 0.9369721 | <.0001*       |
| <i>Mus</i> | 0uM H <sub>2</sub> O <sub>2</sub>            | 2mM NAC +300uM H <sub>2</sub> O <sub>2</sub> | 1.96000    | 0.9369721 | <b>0.1465</b> |
| <i>Mus</i> | 2mM NAC +300uM H <sub>2</sub> O <sub>2</sub> | 300uM H <sub>2</sub> O <sub>2</sub>          | 28.66500   | 0.9369721 | <.0001*       |

| Source   | DF | SS        | MS      | F Ratio  | P-value |
|----------|----|-----------|---------|----------|---------|
| Model    | 2  | 767.09947 | 383.550 | 125.3335 | <.0001* |
| Error    | 9  | 27.54210  | 3.060   |          |         |
| C. Total | 11 | 794.64157 |         |          |         |

| Species       | Levels                                       | -Levels                                      | Difference | SE       | P-value       |
|---------------|----------------------------------------------|----------------------------------------------|------------|----------|---------------|
| <i>Rattus</i> | 0uM H <sub>2</sub> O <sub>2</sub>            | 300uM H <sub>2</sub> O <sub>2</sub>          | 18.41000   | 1.236979 | <.0001*       |
| <i>Rattus</i> | 0uM H <sub>2</sub> O <sub>2</sub>            | 2mM NAC +300uM H <sub>2</sub> O <sub>2</sub> | 3.42000    | 1.236979 | <b>0.0522</b> |
| <i>Rattus</i> | 2mM NAC +300uM H <sub>2</sub> O <sub>2</sub> | 300uM H <sub>2</sub> O <sub>2</sub>          | 14.99000   | 1.236979 | <.0001*       |
